1 **Model-based prediction of bacterial population dynamics in**  
2 **gastrointestinal infection**

3  
4  
5 Janina K. Geißert<sup>1¶</sup>, Erwin Bohn<sup>1¶</sup>, Reihaneh Mostolizadeh<sup>4,5,6¶\*</sup>, Andreas Dräger<sup>4,5,6¶\*</sup>, Ingo B.  
6 Autenrieth<sup>1,6</sup>, Sina Beier<sup>5</sup>, Oliver Deusch<sup>7</sup>, Martin Eichner<sup>2,3</sup> and Monika S. Schütz<sup>1,6¶\*</sup>

7  
8 <sup>1</sup> Institute for Medical Microbiology and Hygiene, University Hospital Tübingen, Elfriede-Aulhorn-Str. 6,  
9 72076 Tübingen, Germany

10 <sup>2</sup> Epimos GmbH, Uhlandstraße 3, 72144 Dußlingen, Germany

11 <sup>3</sup> Institute for Clinical Epidemiology and Applied Biometry, University of Tübingen, Silberstraße 5,  
12 72076 Tübingen, Germany

13 <sup>4</sup> Computational Systems Biology of Infection and Antimicrobial-Resistant Pathogens, Institute for  
14 Bioinformatics and Medical Informatics (IBMI), University of Tübingen, Sand 14, 72076 Tübingen,  
15 Germany

16 <sup>5</sup> Department of Computer Science, University of Tübingen, Sand 14, 72076 Tübingen, Germany

17 <sup>6</sup> German Center for Infection Research (DZIF), partner site Tübingen, Germany

18 <sup>7</sup> CEMET GmbH, Eisenbahnstr. 63, 72072 Tübingen, Germany

19  
20 \* Corresponding authors

21 E-mail: [monika.schuetz@med.uni-tuebingen.de](mailto:monika.schuetz@med.uni-tuebingen.de) (MS), [draeger@informatik.uni-tuebingen.de](mailto:draeger@informatik.uni-tuebingen.de) (AD),

22 [mostoli@informatik.uni-tuebingen.de](mailto:mostoli@informatik.uni-tuebingen.de) (RM)

23  
24 <sup>¶</sup> These authors contributed equally to this work

## 25 **Abstract**

26 The complex interplay of a pathogen with the host immune response and the endogenous microbiome  
27 determines the course and outcome of gastrointestinal infection (GI). Expansion of a pathogen within the  
28 gastrointestinal tract implies an increased risk to develop systemic infection. Through computational  
29 modeling, we aimed to calculate bacterial population dynamics in GI in order to predict infection course  
30 and outcome. For the implementation and parameterization of the model, oral mouse infection  
31 experiments with *Yersinia enterocolitica* were used. Our model takes into account pathogen specific  
32 characteristics, such as virulence, as well as host properties, such as microbial colonization resistance or  
33 immune responses. We were able to confirm the model calculations in these scenarios by experimental  
34 mouse infections and show that it is possible to computationally predict the infection course. Far future  
35 clinical application of computational modeling of infections may pave the way for personalized treatment  
36 and prevention strategies of GI.

## 37 **Introduction**

38 Gastrointestinal infection is a frequent disease that causes significant morbidity and economic burden  
39 (Dautzenberg et al., 2015; Jia et al., 2019). Being self-resolving in most cases, symptomatic treatment (e.g.  
40 rehydration) is sufficient for otherwise healthy individuals.

41 In contrast, gastrointestinal tract (GIT) infection can cause high morbidity and even fatal disease in  
42 healthcare settings and in specific populations such as newborns, elderly and immunocompromised  
43 individuals. According to the OECD Health Report, 2016-2017, ~ 9 % of healthcare-associated infections  
44 were related to the GIT (OECD/European Union Paris/European Union, (2018)). At present it is not  
45 possible to reliably identify patients who are at risk of developing a fatal systemic disease, and we do not  
46 have personalized prevention strategies. Thus, it would be desirable to develop a means to identify high-  
47 risk individuals and to use this knowledge to stratify patient treatment.

48 In recent years the benefit of computational methods to improve patient treatment has been recognized and  
49 we know that the efficacy of drug treatment is highly variable between individuals. Numerous host  
50 factors, such as the composition of the microbiota, can significantly influence the success of a treatment  
51 (Guthrie & Kelly, 2019). Therefore, computational approaches are being developed that integrate  
52 available patient data to derive personalized and improved therapy guidelines (Shameer et al., 2015; Toh  
53 et al., 2019). Related to such approaches, we asked whether we could use computational modeling to  
54 predict the population dynamics of an enteropathogen within the GIT, and thereby predict the infection  
55 course and its likely outcome. With the ability to integrate the host and pathogen specific properties that  
56 the most influence the course and outcome of GIT infection (i.e., virulence factors expressed by the  
57 pathogen, presence of a microbiota, immune competence), such a model could be a helpful tool to identify  
58 individuals at particularly increased risk of developing a fatal disease.

59 To tackle our question, we chose a mouse model of infection that makes the abovementioned factors  
60 accessible and modifiable. Experimental mouse infections were used to generate a dataset to build up,  
61 parametrize, and evaluate the model. *Yersinia enterocolitica* (Ye) was employed as a model  
62 enteropathogen because it has well studied virulence factors. The most important ones are the adhesin  
63 YadA, which mediates attachment to host cells (El Tahir & Skurnik, 2001), and the type three secretion  
64 system (T3SS), which mediates immune evasion (Cornelis, 2002; Ruckdeschel et al., 1996). Both  
65 contribute to the efficient colonization of the intestinal tract which elicits an inflammatory response that  
66 leads to a reduction of density and complexity of the commensal microbiota (Lupp et al., 2007; Stecher et  
67 al., 2007). Strains deficient for either YadA or a functional T3SS were used to modulate the virulence of  
68 Ye and to find out whether these traits affect the infection course. To mimic host microbiota deficiency,  
69 we used germfree (GF) mice. As model for an immune-compromised host, we used *MyD88*<sup>-/-</sup> mice, which  
70 are strongly impaired in their antimicrobial immune responses.

71 Our study provides proof-of-concept that it is possible to create a computational model of gastrointestinal  
72 infection and underlines the validity of such approaches. To create our model, a reasonable knowledge

73 about the infection biology of the causative pathogen was essential. In addition, the accurate definition and  
74 determination of parameter values were crucial. In the future, sophisticated computational models could  
75 be developed and applied in clinical routine to identify high-risk patients and to stratify their treatment in  
76 function of the specific properties of the individual patient and the causative pathogen. Moreover, such  
77 models will contribute to stimulate new hypotheses and provide novel mechanistic insights into the course  
78 of gastrointestinal infections.

## 79 **Results**

80 The final aim of this study was to create a computational model that can predict the course of a GIT  
81 infection by calculating the colony forming units (CFU) in feces as a surrogate. Our model development  
82 process consisted of 6 steps: **Step 1** was the creation of a primary experimental dataset for Ye population  
83 dynamics in a host harboring a diverse microbiota and an intact immune response, i.e. C57BL/6J wild type  
84 mice with a specific pathogen-free (SPF) microbiota. In **step 2**, based on the data from step 1, we  
85 generated hypotheses about Ye population dynamics in the absence of microbiota and in an  
86 immunocompromised host. **Step 3** was to define the most critical interactions between Ye, the host  
87 immune system, and the microbiota. **Step 4** was the mathematical description of Ye population dynamics,  
88 and **step 5** included the experimental determination of specific parameter values and the calibration for  
89 parameters with unknown values. Finally, in **step 6**, we evaluated the model output by comparison to the  
90 experimental data that were obtained by infections of immunocompetent SPF wild type mice, of a host  
91 lacking microbiota (C57BL/6J germfree (GF) mice), and of an immunocompromised host with a diverse  
92 microbiota (C57BL/6J *MyD88*<sup>-/-</sup> SPF mice).

93 (**Step 1**): C57BL/6J wild type SPF mice were infected with a 1:1 mixture of the Ye wild type (wt) strain  
94 and either the Ye Yada0 mutant strain, which lacks the adhesin YadA, or the Ye T3S0 mutant strain,  
95 which is impaired in type three secretion. We then determined the bacterial counts of Ye wt and the co-  
96 infected mutant strains in feces by serial plating on selective media (**Fig. 1A, C**). We found that the Ye wt  
97 strain was able to stably colonize the GIT of all animals over the entire observation period of 14 days. In

98 contrast, the bacterial counts of both the Ye YadA0 and the T3S0 mutant strains never reached Ye wt  
99 levels and dropped below our limit of detection on 10 dpi. The competitive indices show the reduced  
100 virulence of Ye YadA0 and Ye T3S0 compared to wild type (**Fig. 1B, D**). We recorded the individual  
101 body weight of animals, as a sustainable weight loss is a sign of severe infection and fatal outcome. We  
102 found that three (out of 14) animals in the Ye wt : Ye YadA0 and four in the Ye wt : Ye T3S0 coinfection  
103 group significantly lost weight from 3 dpi on, while the mean change in body weight of all other mice  
104 slightly increased or remained static (**Fig. S1A and B**; suppl. files can be found after the references  
105 section). The mean gain of weight of uninfected animals over a time-course of 14 days was ~7 g during  
106 previous studies. Infected animals that were not affected by weight-loss gained weight at a comparable  
107 level. Thus, we do not assume that those animals were suffering from severe infection. The most striking  
108 difference between Ye wt : Ye YadA0 and Ye wt : Ye T3S0 coinfections was that the bacterial counts of  
109 the Ye T3S0 strain peaked later and at considerably lower levels compared to both Ye wt, and the Ye  
110 YadA0 mutant strain.

111

112

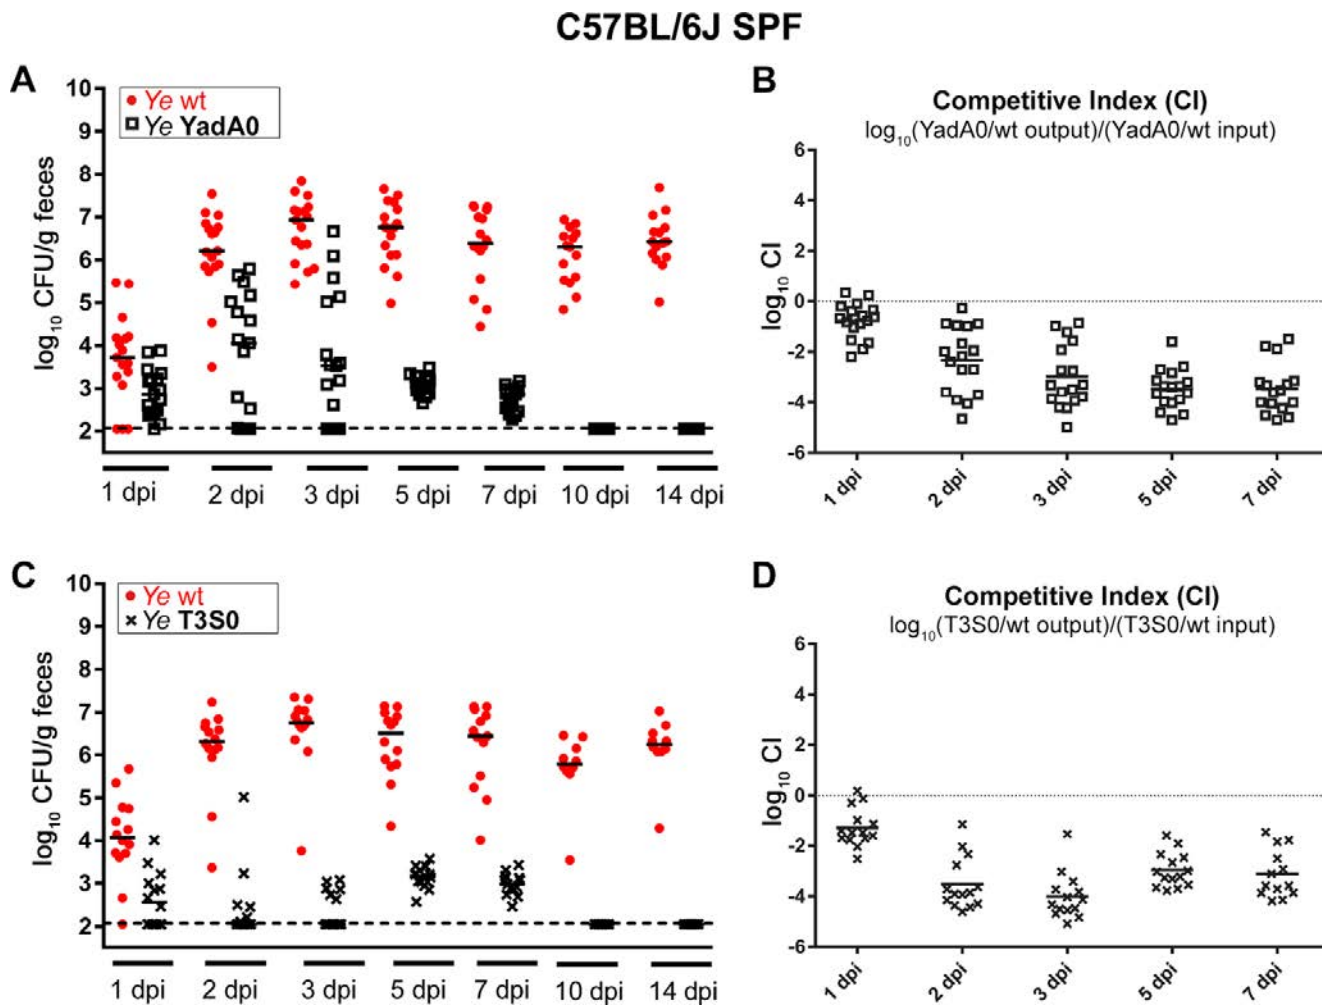

113

114 **Figure 1. *Ye* population dynamics during coinfection of SPF-colonized mice. (A)** Colony forming units (CFU) in  
115 feces of individual animals ( $n = 14$ ) and the median thereof after oral 1:1 coinfection of C57BL/6J SPF mice with a  
116 *Ye* wild type (wt) strain and an attenuated mutant strain lacking the *Yersinia* adhesin A (*Ye* YadA0). The limit of  
117 detection is indicated by a dashed line. **(B)** The competitive index (CI) of the *Ye* wt : *Ye* YadA0 coinfection was  
118 calculated as indicated. A negative CI is indicative of an attenuation of the mutant strain. **(C)** CFU in feces of  
119 individual mice after coinfection with *Ye* wt and a mutant being impaired in type three secretion (*Ye* T3S0). **(D)** CI  
120 of the *Ye* wt : *Ye* T3S0 coinfection.

121 In summary, these data indicate that the pleiotropic functions of YadA and the effector functions mediated  
122 by the T3SS seem to be crucial for effective immune evasion and colonization of the GIT in the presence  
123 of a complex microbiome and an immunocompetent host. This effect has been shown in coinfection for  
124 the first time but has been demonstrated previously in oral single-infections using the YadA deficient  
125 strain and in coinfections with a strain lacking the single effector protein Yop H (Dave et al., 2016; Di  
126 Genaro et al., 2003). The body weight development indicates that, at later time points of infection, a kind  
127 of balanced state might be reached again, although Ye wt still colonizes the GIT at high CFUs.

128 In **step 2**, based on the results of step 1, we inferred Ye population dynamics in a host lacking microbiota  
129 and in an immunocompromised host (**Fig. 2**). We know that in SPF wild type animals (**Fig. 2A and B**) Ye  
130 elicits an innate immune response, leading to an increased antimicrobial peptide (AMP) and cytokine  
131 production as well as infiltration of professional phagocytes into the mucosal site (Handley et al., 2004;  
132 Pepe et al., 1995) (**Fig. S2**). This immune response more strikingly affects the endogenous microbiota and  
133 reduces its density and complexity (**Fig. S3**), especially in locations close to the epithelium. In the  
134 following, we refer to these locations as the mucosal compartment, comprising the mucosa, the  
135 epithelium, and the gut-associated lymphatic tissues, such as the Peyers Patches (PP) and the overlying  
136 microfold cells (M-cells).



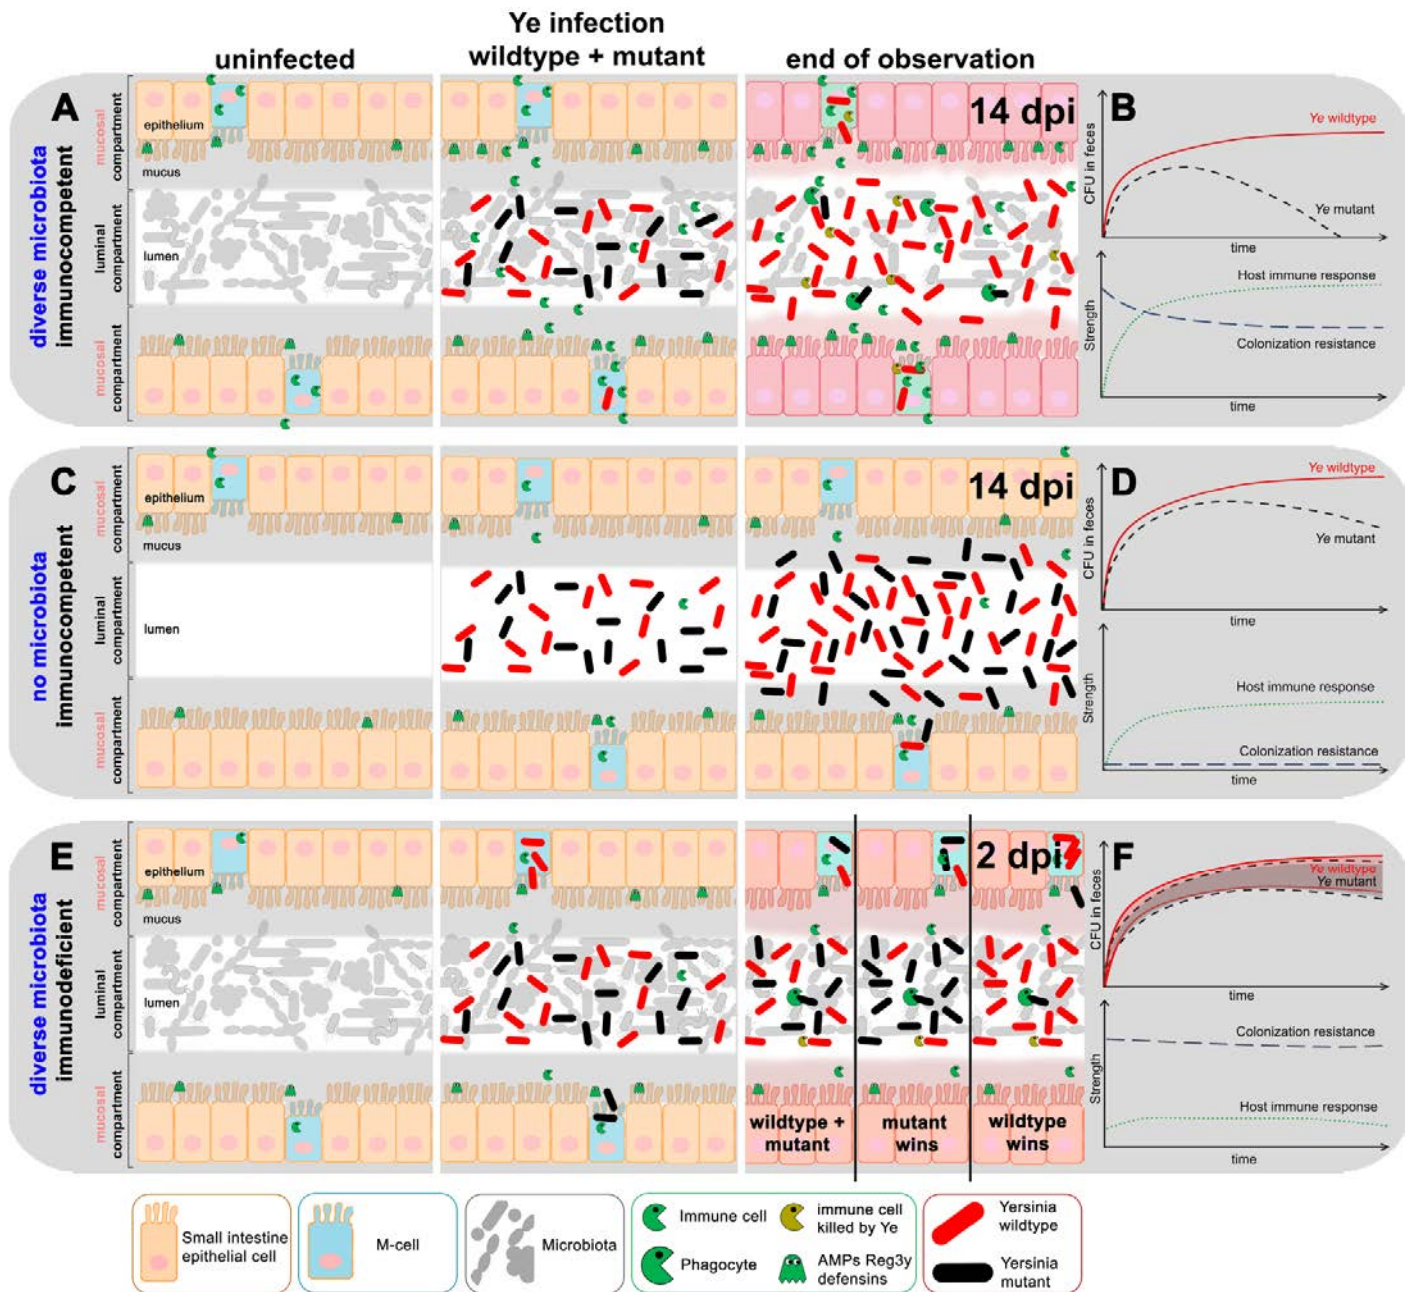

137 **Figure 2. Schematic overview of the presumed infection progression after coinfection of different mouse**  
 138 **models with Ye wt and mutant strains. (A) Scheme of the small intestine of SPF-colonized C57BL/6J wildtype**  
 139 **mice during homeostasis (left), after initial disturbance (mid) and expected outcome after coinfection with a 1:1**  
 140 **mixture of Ye wt and an attenuated mutant strain. Initially, the gut lumen in SPF mice is densely colonized with a**  
 141 **complex microbiota. Ye infection, associated with an infiltration of microfold cells (M-cells) mainly conducted by**  
 142 **the wt strain, leads to an unspecific antimicrobial immune response accompanied by the release of phagocytic cells**  
 143 **into the gut lumen and augmented expression of antimicrobial proteins (AMPs, Reg3 $\gamma$ , defensins) by epithelial cells.**  
 144 **Both the antimicrobial response and inflammation affect at least parts of the microbiota and reduce its complexity**



145 and density. Whereas Ye wt can counteract phagocytosis by injection of effectors into immune cells and thereby kills  
146 them, the Ye mutant strain is more susceptible to phagocytosis and killing by immune cells and thus is finally  
147 outcompeted 14 days after infection onset. **(B)** Schematic overview of expected Ye wt and mutant CFU in feces  
148 during the infection course (upper diagram) and the presumed strength of host immune response and colonization  
149 resistance (CR; bottom diagram). **(C)** In germ-free (GF) mice that lack a microbiota that confers CR and harbor an  
150 immature immune system, Ye wt, and mutant strain are both able to colonize the gut lumen and do not necessarily  
151 need to enter a mucosa-near site to colonize the gut effectively. This leads only to weak antimicrobial responses that  
152 Ye can cope with, without the necessity to possess specific virulence traits (such as YadA or a functional T3SS).  
153 This results in comparable numbers of wt and mutant strains at the end of the observation period. **(D)** Presumed  
154 CFUs of Ye wt and mutant strain in feces of GF mice (upper diagram). The immune responses in GF animals are less  
155 potent as compared to C57BL/6J wild type mice while microbial CR is absent (bottom diagram). **(E)** In SPF-  
156 colonized *MyD88*<sup>-/-</sup> mice we assume that the strongly limited immune reaction does not significantly affect the CR  
157 that is mediated by the endogenous microbiota. This will presumably result in a lower overall Ye cell count in the gut  
158 compared to the SPF wild type and GF mice. The immune deficiency entails an almost contingent infection outcome  
159 (right panel) resulting in either comparable numbers of the Ye wt and the mutant strain or one of the strains being  
160 more abundant at two days after infection. Please note that the infection course in the *MyD88*<sup>-/-</sup> mice has to be  
161 monitored for a shorter period due to adherence to animal welfare regulations. **(F)** The presumed coincidental CFU  
162 development in feces is illustrated by overlapping, shaded areas (upper diagram). Limited immune responses are  
163 reducing CR to a low level (bottom diagram).

164  
165 Consequently, Ye can colonize and replicate in the mucosal compartment if able to resist the host immune  
166 defense. As this compartment has a specific capacity, Ye cells that exceed this capacity drain into the  
167 lumen and finally end up in measurable CFUs in feces. Since only the Ye wt strain can cope adequately  
168 with the attack of phagocytes, both a YadA- and a T3SS-deficient strain will be quickly eliminated despite  
169 initial colonization as experimentally observed by us (**Fig. 1**) and others (Cornelis, 2002; Pepe et al., 1995;  
170 Ruckdeschel et al., 1996).

171 The situation is different in a host lacking a microbiota (**Fig. 2C and D**). In the absence of competing  
172 microbiota in GF mice, both the Ye wt and the mutant strain can expand within the lumen of the GIT  
173 (which will be termed the luminal compartment in the following) without the need to enter a mucosa-near  
174 site to colonize the gut (**Fig. 2D**). The innate immune response to Ye is presumably less intense than in  
175 SPF mice, because the immune system is not developed correctly in the absence of microbiota  
176 (Macpherson & Harris, 2004; Round & Mazmanian, 2009) (**Fig. 2D and Fig. S2**). Still, mutant strains  
177 will be eliminated more efficiently compared to Ye wt. This might lead to a slow reduction of the mutant  
178 strain at late time points after infection. Taken together, due to the lack of microbiome in GF mice, we  
179 assume that both, the Ye wt and the mutant strain, will colonize the GIT at high numbers.

180 In an immunodeficient host (i.e., *MyD88*<sup>-/-</sup> mice), harboring a diverse microbiota (**Fig. 2E and F**), we  
181 expect a faster progression of infection (Bhinder et al., 2014; Friedrich et al., 2017; Gibson et al., 2008;  
182 Lebeis et al., 2007). Additionally, we anticipate an amelioration of the difference between Ye wt and  
183 mutant strain CFUs during the infection course, because a better colonization of Ye wt is mostly the result  
184 of its ability to survive the host immune reaction. As the immune system is only weakly active here,  
185 having the full capacity of immune evasion mechanisms is no longer a clear advantage for the Ye wt  
186 strain. Thus, we hypothesize that coinfection can result in different outcomes (wild type + mutant, only  
187 mutant, or only wild type detectable).

188 **In step 3**, based on our hypotheses described above, we devised the most critical interactions among Ye,  
189 the host immune system and the microbiota upon host entry and their impact on Ye population dynamics.  
190 These interactions will later be included in the model and described mathematically:

191 (A) Population dynamics in the mucosal compartment: after oral coinfection with a Ye wt and a mutant  
192 strain, both enter the lumen of the small intestine (SI). A portion of these Ye is then able to enter an extra-  
193 luminal location, the “mucosal compartment.” If not attached to surfaces within the SI, bacteria will be  
194 transported towards the colon due to peristalsis. Within the colon, water will be reabsorbed from the  
195 intestinal content, and all bacteria finally end up in feces. Both the retention time and the replication rate

196 of the bacteria determine how many bacteria will be detected in feces at a distinct time point. As Ye cells  
197 presumably have a lower replication rate than the endogenous microbiota, their CFU in feces would  
198 rapidly decline compared to that of the commensals should they fail to establish a replicating population  
199 within the SI. However, experimental data show that the Ye CFU per g of content in the SI at a later time  
200 point of infection (7 dpi) is relatively high, especially in the distal part of the SI (**Fig. S4**), and we have  
201 hints that there actually does exist a niche within the GIT that can be colonized by Ye (**Fig. S5**). We  
202 hypothesize that Ye located in the mucosal compartment can resist removal by peristalsis and can even  
203 replicate. Since this compartment would have a restricted capacity only, one model assumption is that all  
204 Ye cells exceeding this capacity will re-enter and feed the luminal populations and contribute to the CFU  
205 in feces.

206 Bacterial interactions in the mucosal compartment: Ye expresses several virulence factors that facilitate  
207 efficient immune evasion. This capability is especially important in the mucosal compartment, where the  
208 number of immune cells and the concentration of AMPs are high. Therefore, we assume that Ye can  
209 proliferate in the mucosal compartment, which is also colonized by a small number of commensal  
210 bacteria. The growth dynamics of both Ye and commensal bacteria are determined by their initial numbers  
211 and their distinct growth rates. We assume that the endogenous microbiome in total has a higher growth  
212 rate compared to Ye because the microbiome members are rather diverse and do not necessarily compete  
213 for nutrients or suitable niches. Importantly, the combined number of all bacterial populations in the  
214 mucosal compartment is restricted by a fixed capacity. Hence, Ye and members of the microbiota compete  
215 for colonization of this compartment, and further expansion of the population is only possible if the  
216 capacity limit has not been reached yet.

217 (B) The influence of the immune system: host immunity involves humoral and cellular factors. For the  
218 sake of simplicity, we summarized all host defense activities in one abstract immune action that only  
219 affects the mucosal compartment, but is negligible in the luminal compartment. We hypothesize that the  
220 presence of Ye in the mucosal compartment activates the immune system. This activation increases

221 proportionally to the number of Ye cells. As only the Ye wt strain has a full arsenal of virulence factors  
222 that allow efficient immune evasion, we assume that the Ye mutant strains and commensal bacteria are  
223 much more susceptible to killing by the immune system than the wild type.

224 (C) Population dynamics in the luminal compartment: most of the Ye applied orally during the initiation  
225 of infection enter the luminal compartment already populated with microbiota. We assume the same  
226 bacterial growth rates in the luminal and mucosal compartment and set a limit to the total bacterial  
227 capacity of the lumen. Moreover, this capacity is conceivably larger than that of the mucosal site. The  
228 CFU of Ye in the luminal compartment over time is - as in the mucosal compartment - determined by the  
229 initial quantity of Ye and a distinct growth rate. Additionally, bacteria that exceed the capacity of the  
230 mucosal compartment spill over into the luminal compartment and thereby contribute to the CFU in the  
231 lumen. We summarized and depicted all our considerations in **Fig. 3**.

232

233

234

235

236

237

238

239

240

241

242

243

244

245

246

247

248

249

250

251

252

253

254

255

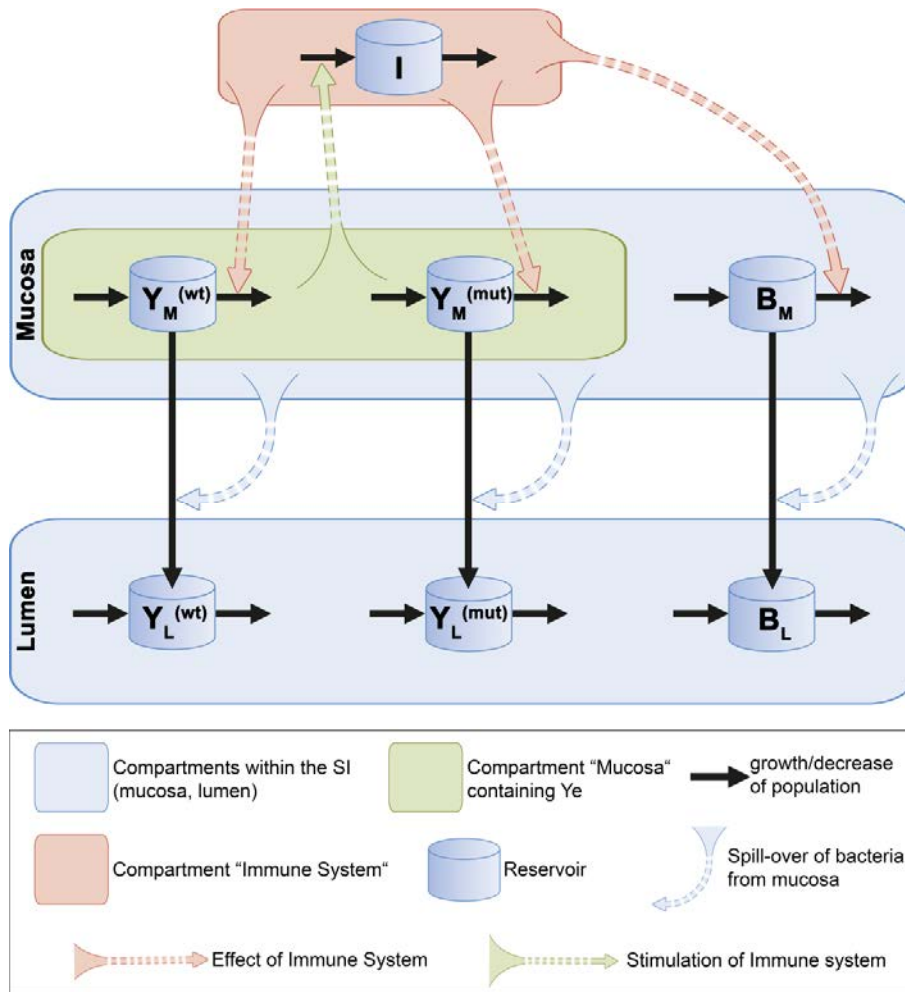

256 **Figure 3. Schematic depiction of the model composition and interaction networks.** The model calculates

257 population dynamics of the Ye wt ( $Y_L^{(wt)}$ ;  $Y_M^{(wt)}$ ) and mutant strain ( $Y_L^{(mut)}$ ,  $Y_M^{(mut)}$ ) as well as of commensal

258 bacteria ( $B_L$ ;  $B_M$ ) at two different sites of the small intestine (SI), the luminal site and the extra-luminal mucosal site

259 ("mucosa"; "lumen"). Additionally, it includes an abstract immune response with a distinct immune cell population

260 (I). Bacterial and immune cell populations are illustrated as reservoirs. Individual growth rates determine the growth

261 of bacterial populations. Decrease of populations is caused by intestinal peristaltic movement in the lumen and by

262 immune killing in the mucosa. Furthermore, a movement of bacteria from the mucosal compartment to the luminal

263 compartment takes place. Upon entry of Ye wt or mutant strains to the mucosal compartment, they stimulate an

264 immune response, which reciprocally affects all Ye and commensal populations within this compartment. Equipped

265 with immune evasion factors, the Ye wt strain is less affected by the immune response than the Ye mutant strain,

266 whereas both are more resistant than the commensal bacterial population ( $B_M$ ). Replicating populations that exceed  
267 the limited capacity of the mucosa drain into the lumen and thereby feed luminal populations. As a result of these  
268 bacterial population dynamics in the lumen, the model output is the calculated CFU of the bacteria ending up in  
269 feces. These curves are equivalent to experimental CFU data generated from feces of orally infected mice.

270  
271 Based on the experimental data and theoretical considerations (Step 1 to 3), in **step 4**, we come up with  
272 the following mathematical model. As pointed out above, we assume that, following oral infection, a 1:1  
273 mixture of the Ye wt and the mutant strain enters the SI. Most of the Ye remain in the lumen, but a small  
274 number enters the mucosal compartment. We assume that few commensal bacteria already populate this  
275 location. The growth dynamics of the commensal bacteria  $B_M$ , the wild type  $Y_M^{(wt)}$ , and the mutant strain  
276  $Y_M^{(mut)}$  in the mucosal compartment are determined by their quantities and by their growth rates, described  
277 by a logistic growth with a maximum possible size. The growth rate  $\alpha^{(B)}$  of the endogenous commensal  
278 bacteria is presumably higher than the Ye growth rates  $\alpha^{(wt)}$  and  $\alpha^{(mut)}$ , respectively.

279 Moreover, the growth rates  $\alpha^{(wt)}$  and  $\alpha^{(mut)}$  are assumed to be equal. The capacity  $C_M$  limits the expansion of  
280 the bacterial population in the mucosal compartment. When bacteria counts exceed this capacity, bacteria  
281 spill over to the lumen at the following rates  $\sigma$ :

$$282 \sigma_{M \rightarrow L}^{(wt)} = \alpha^{(wt)} \frac{B_M + Y_M^{(wt)} + Y_M^{(mut)}}{C_M}, \sigma_{M \rightarrow L}^{(mut)} = \alpha^{(mut)} \frac{B_M + Y_M^{(wt)} + Y_M^{(mut)}}{C_M}, \text{ and } \sigma_{M \rightarrow L}^{(B)} = \alpha^{(B)} \frac{B_M + Y_M^{(wt)} + Y_M^{(mut)}}{C_M}.$$

283 A variable that determines the infection course is the effect of  $I$ , the immune system. In the presence of Ye  
284 in the mucosa  $Y_M$ ,  $I$  is stimulated at rate  $\kappa$ , but its strength is limited to a capacity  $C_I$ , resulting in a logistic  
285 growth  $(Y_M^{(wt)} + Y_M^{(mut)}) \cdot \kappa \cdot \frac{C_I - I}{C_I}$ .

286  $I$  directly acts on bacteria present in the mucosa but influences only indirectly the luminal populations by  
287 affecting the spillover from the mucosal compartment into the lumen. The immune system kills  $Y_M^{(mut)}$   
288 more efficiently than  $Y_M^{(wt)}$ , which has a full arsenal of virulence factors that allow efficient immune



289 evasion. However, members of the commensal microbiome  $B_M$  are the most susceptible to killing by  $I$ .  
 290 This killing is modeled by using the term  $(\gamma \cdot I \cdot B_M)$ . We use the adjustment factors  $f_Y^{(wt)}$  and  $f_Y^{(mut)}$  to  
 291 account for the different susceptibilities of  $Y_M^{(wt)}$  and  $Y_M^{(mut)}$  towards killing by  $I$  and the even higher  
 292 susceptibility of  $B_M$ . The following differential equations describe the resulting dynamics of bacterial  
 293 populations and immunity strength at the mucosal site:

294 (1) 
$$\frac{dY_M^{(wt)}}{dt} = (\alpha^{(wt)} - \sigma_{M \rightarrow L}^{(wt)} - \gamma \cdot f_Y^{(wt)} \cdot I) \cdot Y_M^{(wt)}$$

295 (2) 
$$\frac{dY_M^{(mut)}}{dt} = (\alpha^{(mut)} - \sigma_{M \rightarrow L}^{(mut)} - \gamma \cdot f_Y^{(mut)} \cdot I) \cdot Y_M^{(mut)}$$

296 (3) 
$$\frac{dB_M}{dt} = (\alpha^{(B)} - \sigma_{M \rightarrow L}^{(B)} - \gamma \cdot I) \cdot B_M$$

297 (4) 
$$\frac{dI}{dt} = \left( Y_M^{(wt)} + Y_M^{(mut)} \right) \cdot \kappa \cdot \frac{C_I - I}{C_I}$$

298 Most of the  $Y_e$  from the oral infection enter the lumen of the SI. Additionally, luminal populations are fed  
 299 by bacterial spill over from the mucosal compartment. The lumen is already populated with commensal  
 300 bacteria. For the sake of simplicity, we use the same bacterial growth rates  $\alpha^{(B)}$ ,  $\alpha^{(wt)}$ , and  $\alpha^{(mut)}$  in the lumen  
 301 as at the mucosal site. As we limit the total bacterial capacity of the lumen to a large number  $C_L$ , we obtain  
 302 the following logistic growth for the luminal compartment:

303 
$$\alpha_L^{(wt)} = \alpha^{(wt)} \frac{C_L - (B_L + Y_L^{(wt)} + Y_L^{(mut)})}{C_L}, \alpha_L^{(mut)} = \alpha^{(mut)} \frac{C_L - (B_L + Y_L^{(wt)} + Y_L^{(mut)})}{C_L}, \text{ and}$$

304 
$$\alpha_L^{(B)} = \alpha^{(B)} \frac{C_L - (B_L + Y_L^{(wt)} + Y_L^{(mut)})}{C_L}$$

305 Bacteria in the lumen move along the intestinal tract and are finally excreted at a removal rate  $\beta$ .  
 306 Combining all this, the following set of equations gives the dynamics of the bacterial populations in the  
 307 lumen:

308 (5) 
$$\frac{dY_L^{(wt)}}{dt} = \left( \alpha_L^{(wt)} - \beta \right) \cdot Y_L^{(wt)} + \sigma_{M \rightarrow L}^{(wt)} \cdot Y_M^{(wt)}$$

309 (6) 
$$\frac{dY_L^{(mut)}}{dt} = \left( \alpha_L^{(mut)} - \beta \right) \cdot Y_L^{(mut)} + \sigma_{M \rightarrow L}^{(mut)} \cdot Y_M^{(mut)}$$

310 
$$(7) \frac{dB_L}{dt} = (\alpha_L^{(B)} - \beta) \cdot B_L + \sigma_{M \rightarrow L}^{(B)} \cdot B_M$$

311 One of the most challenging steps in modeling is the estimation of unknown parameter values in an  
312 ordinary differential equation system from experimental data (**Step 5**). In order to solve the system, we,  
313 therefore, aimed to reduce the number of parameters with unknown values. This was achieved either  
314 through experimental approaches, if possible, by estimating biologically meaningful ranges for unknown  
315 parameters (based on literature and own data), or, at least, by defining the relations between distinct  
316 parameters (higher/lower/same as). To this end, we experimentally determined the gut passage time of  
317 C57BL/6J wild type SPF (termed SPF from now on), C57BL/6J wild type GF (termed GF from now on),  
318 and *MyD88*<sup>-/-</sup> SPF (termed *MyD88*<sup>-/-</sup> from now on) animals and found that in the GF animals the gut  
319 passage time is much longer than in SPF and *MyD88*<sup>-/-</sup> animals (**Fig. S6**). We also determined  
320 immunological parameters of SPF, GF, and *MyD88*<sup>-/-</sup> animals, thus supporting our assumptions in regard  
321 to the relative strength of the immune response in the three distinct systems (**Fig. S2**).

322 To find reasonable values for parameters that either cannot at all be determined experimentally or only  
323 with non-justifiable cost and effort, we started a computational parameter optimization to yield predictions  
324 in best agreement with experimental data. Therefore, we used built-in optimization methods of MATLAB  
325 (see Materials and Methods). Detailed information for all parameters (definition, source of parameter  
326 values, function, and relation to other parameters) is given in **Table 1**. Of note, the model implementation  
327 and the optimization process were at first based on the dataset generated from the coinfection of SPF wild  
328 type mice with the Ye wt and the YadA0 mutant.

329

330 **Table 1** Overview about model parameters, source of values, function, relation to other parameters and preset  
 331 boundary or the exact value used for parameter calculation

| Parameter                | Definition                                                             | Source of parameter value                                       | Functions                                                                                                                                           | Relation to other/Comment                                                       | Preset boundary/exact value                 |
|--------------------------|------------------------------------------------------------------------|-----------------------------------------------------------------|-----------------------------------------------------------------------------------------------------------------------------------------------------|---------------------------------------------------------------------------------|---------------------------------------------|
| $\alpha^{(B)}$           | growth rate of commensal bacteria                                      | calculated                                                      | Adjustable growth rate of commensal bacteria                                                                                                        | higher compared to growth rate of Ye                                            | 0.4-2.0                                     |
| $\alpha^{(wt)}$          | growth rate of the Ye wt                                               | calculated                                                      | Adjustable growth rate of the Ye wt strain                                                                                                          | same as growth rate $\alpha^{(mut)}$                                            | 0.4-2.0                                     |
| $\alpha^{(mut)}$         | growth rate of the Ye mutants                                          | calculated                                                      | By adjustment of the Ye mutant growth rate, the model is able to account for growth deficiencies                                                    | same as growth rate $\alpha^{(wt)}$                                             | 0.4-2.0                                     |
| $\beta^{(SPF)}$          | discharge rate of intestines                                           | exp. data (0.22/h)                                              | Adjustable rate accounting for varying GIT passage times in different host models                                                                   | higher as in Myd88 <sup>-/-</sup> and GF                                        | 0.22                                        |
| $\beta^{(GF)}$           | rate at which the intestines are discharged                            | exp. data (0.08/h)                                              | Adjustable rate accounting for varying GIT passage times in different host models                                                                   | lower as in SPF and Myd88 <sup>-/-</sup>                                        | 0.08                                        |
| $\beta^{(Myd88^{-/-})}$  | rate at which the intestines are discharged                            | exp. data (0.18/h)                                              | Adjustable rate accounting for varying GIT passage times in different host models                                                                   | lower as in SPF, but higher compared to GF animals                              | 0.18                                        |
| $\gamma$                 | immunity action rate                                                   | adjustment factor for the immune action; 1 means 100 % activity | Allows adjustment of the global immune action to account for immune deficiencies in a specific host                                                 | lower in GF and Myd88 <sup>-/-</sup>                                            | 0.1-1.0                                     |
| $f_y^{(wt)}$             | immunity adjustment factor of the Ye wt                                | calculated                                                      | Allows adjustment of resistance of the Ye wt strain to immune killing and thereby accounts for immune evasion mechanisms of a pathogen              | lowest as compared to $f_y^{(YadA0)}$ and $f_y^{(T350)}$                        | 0.001-0.11                                  |
| $f_y^{(YadA0)}$          | immunity adjustment factor of the Ye YadA0 strain                      | calculated                                                      | Adjustment allows to account for an increased (or reduced) susceptibility to immune killing due to mutations affecting Ye immune evasion mechanisms | higher compared to $f_y^{(wt)}$ but lower or equal compared to $f_y^{(T350)}$   | 0.11-0.2                                    |
| $f_y^{(T350)}$           | immunity adjustment factor of the Ye T350 strain                       | calculated                                                      | see above                                                                                                                                           | higher compared to $f_y^{(wt)}$ and higher or equal compared to $f_y^{(YadA0)}$ | 0.11-0.2                                    |
| $C_i$                    | capacity of the immune system                                          | predefined                                                      | Caps the maximum activity of the immune system                                                                                                      | $C_i = 1$ means that the immune system is fully operative                       | maximum = 1                                 |
| $C_M$                    | capacity of the mucosal site                                           | calculated                                                      | Caps the replication of populations within the mucosa to an adjustable maximum capacity                                                             | lower as $C_i$                                                                  | $10^3$ - $10^7$                             |
| $C_L$                    | capacity of the luminal site                                           | calculated                                                      | Caps the replication of populations within the intestinal lumen to an adjustable maximum capacity                                                   | higher as $C_M$                                                                 | $10^6$ - $10^{10}$                          |
| $\kappa$                 | rate of immune growth                                                  | calculated                                                      | Allows adjustment of the rate at which the immune response is activated                                                                             | unknown                                                                         | 0.004-01                                    |
| <b>thickening factor</b> | reflects water extraction from fecal material during the colon passage | calculated from exp. data                                       | Allows to adjust experimentally measured CFU in fecal pellets and model-calculated CFU (within intestines)                                          | -                                                                               | 1.3 (SPF/MyD88 <sup>-/-</sup> )<br>0.2 (GF) |

332

333 When evaluating the model (**Step 6**), we found that the model output was in good agreement with the Ye  
334 population dynamics that we determined experimentally in SPF mice co-infected with Ye wt and Ye  
335 YadA0 (**Fig. 4A**). Independent estimation of parameters based on a second experimental dataset that was  
336 obtained by co-infection of SPF mice with Ye wt and Ye T3S0 delivered slightly different, but  
337 comparable absolute parameter values compared to Ye wt : Ye YadA0 coinfection. Hence, we did observe  
338 concordance of the model output with the experimental data (**Fig. 4B**). Strikingly, the model even reflects  
339 a difference between the dynamics of CFU development of the Ye YadA0 and the Ye T3S0 strain.

340

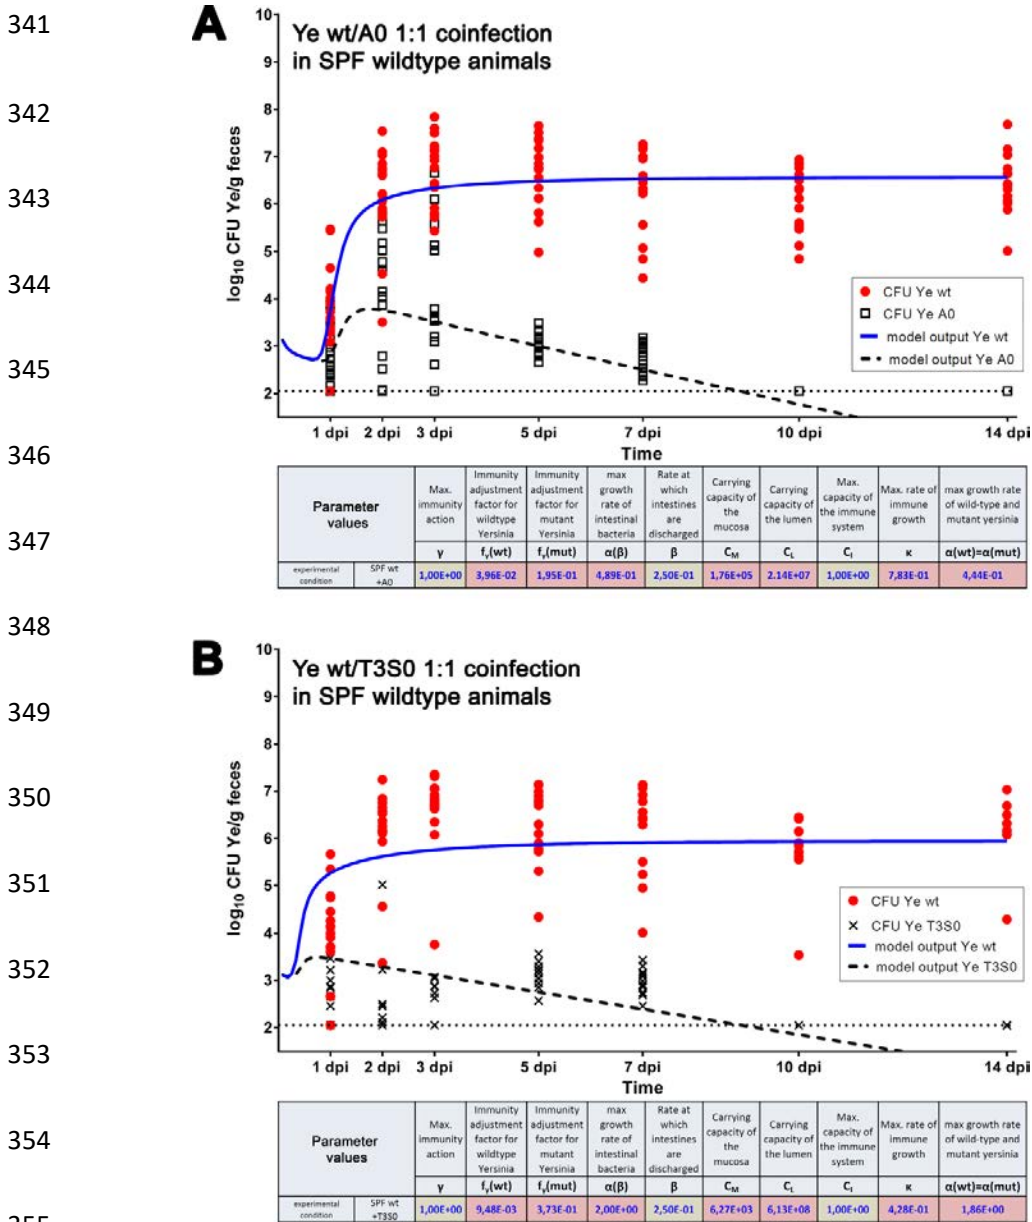

356 **Figure 4. Overlay of model output and experimentally determined CFU values during Ye coinfection of SPF**  
 357 **wild type mice.** For the model prediction, the listed parameter values were used. (A) Model output for CFU of Ye wt  
 358 and Ye YadaA0 shown as an overlay with experimental data. CFU values of individual animals at indicated time  
 359 points are shown for Ye wt and Ye YadaA0. The dotted line indicates the limit of detection of our experimental  
 360 system. (B) Model output for CFU of Ye wt and Ye T3S0 as an overlay with experimentally determined CFU values  
 361 from the Ye wt : Ye T3S0 coinfection of SPF wild type mice. Calculated parameter values (red background) and  
 362 fixed parameter values (green background) are shown in the tables.

363 Moreover, our finding that Ye T3S0 is more susceptible to killing compared to Ye YadA0 is also  
364 corroborated by the model. Looking at the relative values compared to Ye wt ( $f_Y^{(mut)}/f_Y^{(wt)}$ ), the Ye  
365 YadA0 strain is ~5 times and the Ye T3S0 ~ 40 times more susceptible to killing by the immune system.  
366 The calculated parameter values obtained for these experimental datasets are depicted as insets in **Fig.**  
367 **4.** To better comprehend how changes in the relations of  $f_Y^{(wt)}$  and  $f_Y^{(mut)}$  impact on CFU development  
368 we additionally created **Fig. S7**. Taken together, the predicted population development in the SPF wild  
369 type host for both coinfection settings served as a proof of the appropriateness of the model as it proved to  
370 be in line with the experimentally observed infection course.

371 **Challenging the model: Lack of microbiota.** In order to challenge our model, different basic parameter  
372 settings for microbiota-derived CR and host immune competence were adapted, and the resulting model  
373 predictions were analyzed by comparing them to experimental coinfection data. To decipher the effect of  
374 the absence of the microbiota on CFU development, we defined the number of  $B_M$  and  $B_L$  (i.e., number of  
375 bacteria in mucosal (M) and luminal compartment (L)) to be 0. Moreover, we considered that the fecal  
376 pellets have a higher water content in GF mice, as experimentally determined (**Table S8**). The higher  
377 water content was reflected by using a different thickening factor. Furthermore, we took into account the  
378 lower discharge rate in GF mice (12 h mean residence time instead of 4.5 h in SPF animals) which we had  
379 also determined experimentally (**Fig. S6**). Experimental coinfection of GF mice with Ye wt + Ye YadA0  
380 or Ye wt + Ye T3S0, respectively, revealed that both the Ye wt and the mutant strains reached remarkably  
381 higher cell counts in feces as compared to CFU levels in SPF colonized mice. The T3S0 strain exhibited a  
382 slight attenuation resulting in apparently lower CFUs, particularly from 7 dpi on, whereas Ye wt and Ye  
383 YadA0 counts remained constant at a high level over the entire observation period of 14 days (**Fig. 5**). Our  
384 data thus indicate that in the absence of a commensal microbiome, both YadA and the T3SS seem to be  
385 dispensable for effective colonization of the GIT.



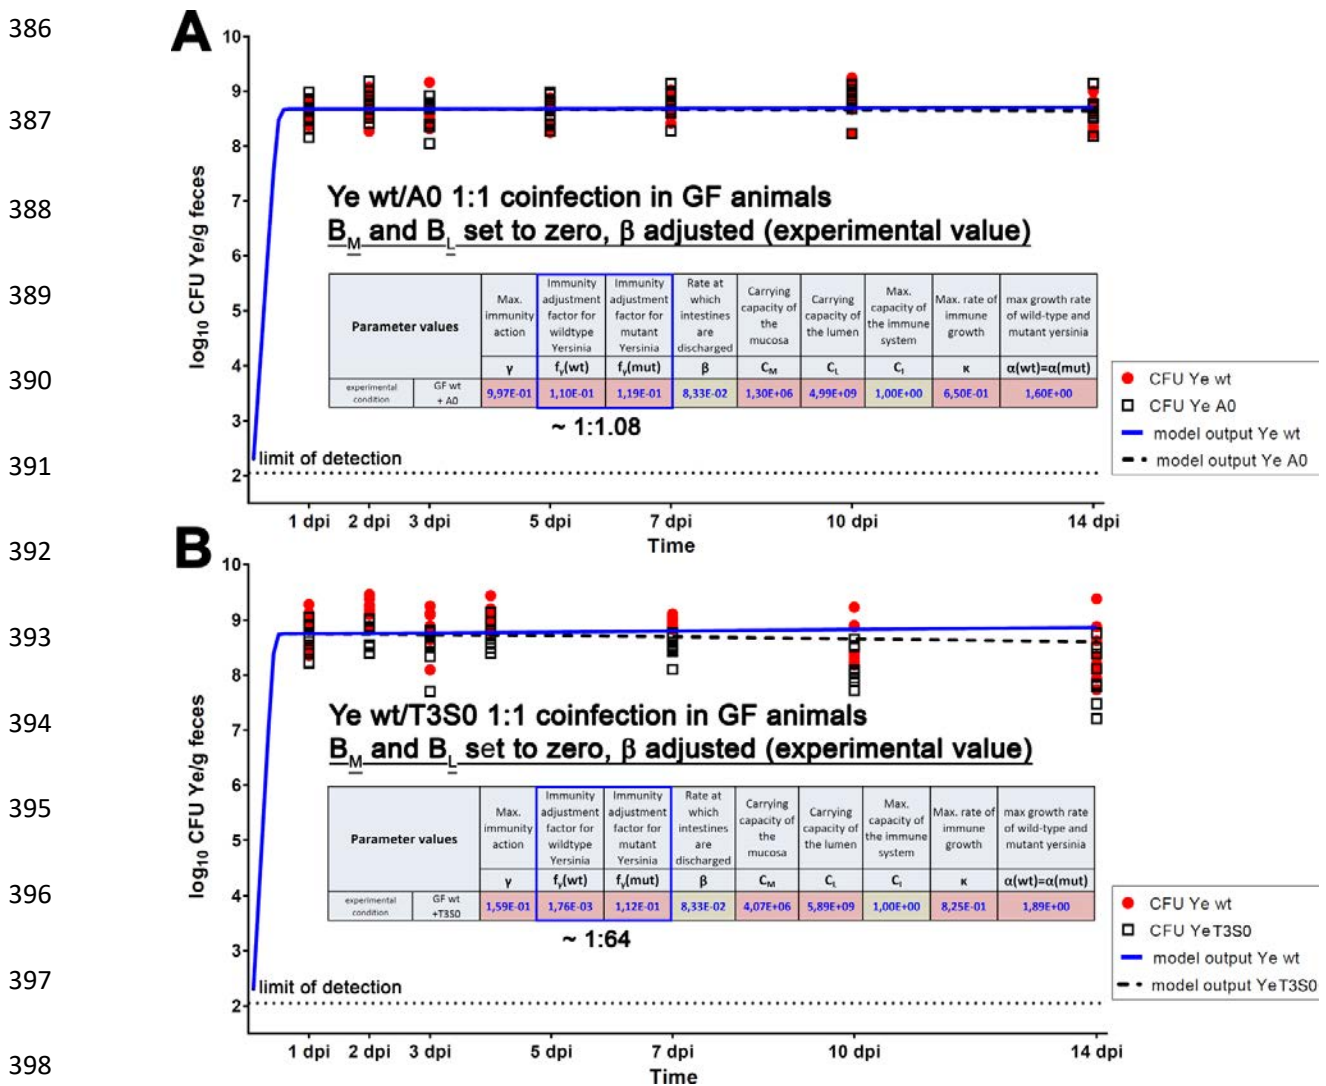

401 **Figure 5. Challenging the model part I: Absence of microbiota (A)** Overlay of model output for CFU of Ye wt  
 402 and Ye YadaA0 or **(B)** Ye wt and Ye T3S0 and experimentally determined CFU levels from coinfections of GF mice.  
 403 All parameters were estimated based on respective experimental data (parameter values are listed in the inset table).

404

405 Next, we ran the model for the Ye wt : Ye YadA0 coinfection setting by keeping defined boundaries only  
406 for some parameters that were justified from a biological point of view (**Table 1**), and values we had  
407 determined experimentally. The model output was in good agreement with the experimentally determined  
408 course of CFU development (**Fig. 5A**). We also found that the parameter values that the most differed  
409 from what we had previously obtained for the SPF wild type model were higher capacities  $C_M$  and  $C_L$  for  
410 the mucosal and the luminal compartment, respectively. This makes sense, as GF animals have massively  
411 enlarged intestines. Interestingly,  $f_Y^{(wt)}$  and  $f_Y^{(mut)}$  were estimated to be very similar (0.110 for Ye wt and  
412 0.119 for Ye YadA0). This corroborates our interpretation of the infection course in GF mice. Here, the  
413 Ye YadA0 strain does not have any disadvantage compared to the Ye wt strain and can expand within the  
414 gut to the same extent. Thus, also in the model, YadA seems to be dispensable for effective colonization in  
415 the absence of a microbiota.

416 When we estimated  $\gamma$  in this setting, we obtained an optimized value of  $\sim 0.997$  (**Fig. 5A**), which is very  
417 similar compared to SPF. This finding was surprising as we had expected lower activity of the immune  
418 system in the GF setting according to literature and our own data (see also **Fig. S2**). However, our model  
419 predicts that the overall influence of  $\gamma$  on the expansion of Ye is only subtle (**Fig. S9**). This can be  
420 explained by the absence of the endogenous microbiota that competes with Ye for filling the capacity of  
421 the small intestine in the SPF animals. We also modeled the GF Ye wt : Ye T3S0 coinfection and obtained  
422 very similar results compared to the Ye wt : Ye YadA0 coinfection (**Fig. 5B**). The most apparent  
423 difference was that the predicted CFU for the T3S0 mutant strain slightly dropped towards the end of our  
424 observation period, which is in line with our experimental data. Again, this difference in the behavior of  
425 Ye YadA0 and Ye T3S0 can be explained with their different susceptibility to killing by the host immune  
426 system. As in the absence of a microbiome both strains can expand very quickly, the effect of the  
427 increased susceptibility of Ye T3S0 to killing is not as high as in the SPF model system. Taken together,  
428 our model can compute Ye population dynamics also under GF conditions, and the results correlate with  
429 our experimental data.

430 **Challenging the model: The immunocompromised host.** As a second evaluation of our model, we  
431 aimed to mimic an immunocompromised host. We made use of *MyD88*<sup>-/-</sup> C57BL/6J mice that were  
432 colonized with a SPF microbiota as a model to decipher the role of a restricted immune response in *Ye*  
433 population dynamics. We assumed a more rapid and frequent invasion due to the reduction of the immune  
434 response, as depicted in **Fig. 2E** and **2F**. As in the SPF wild type model, in the *MyD88*<sup>-/-</sup> animals, *Ye*  
435 encounters the mucosal compartment occupied by commensals. Because of the MyD88 deficiency, a  
436 much weaker immune response is induced. This primarily has two consequences: (i) The microbiota is  
437 less disturbed and reduced. Therefore, *Ye* is less successful in establishing a population in the mucosal  
438 compartment, and the *Ye* counts will be lower. As the mucosal compartment feeds the luminal *Ye*  
439 population by spill over, we will observe a lower *Ye* CFU in the GIT compared to C57BL/6J wild type  
440 animals. (ii) Due to the weak immune response of the *MyD88*<sup>-/-</sup> animals, we assume that the disadvantage  
441 of the mutant strains in competition with *Ye* wt is much less pronounced.

442 Finally, we co-infected SPF colonized *MyD88*<sup>-/-</sup> mice, as described before. To compare the experimental  
443 results and modeling data, we created an overlay of the model output and the experimental data (**Fig. 6**).

444

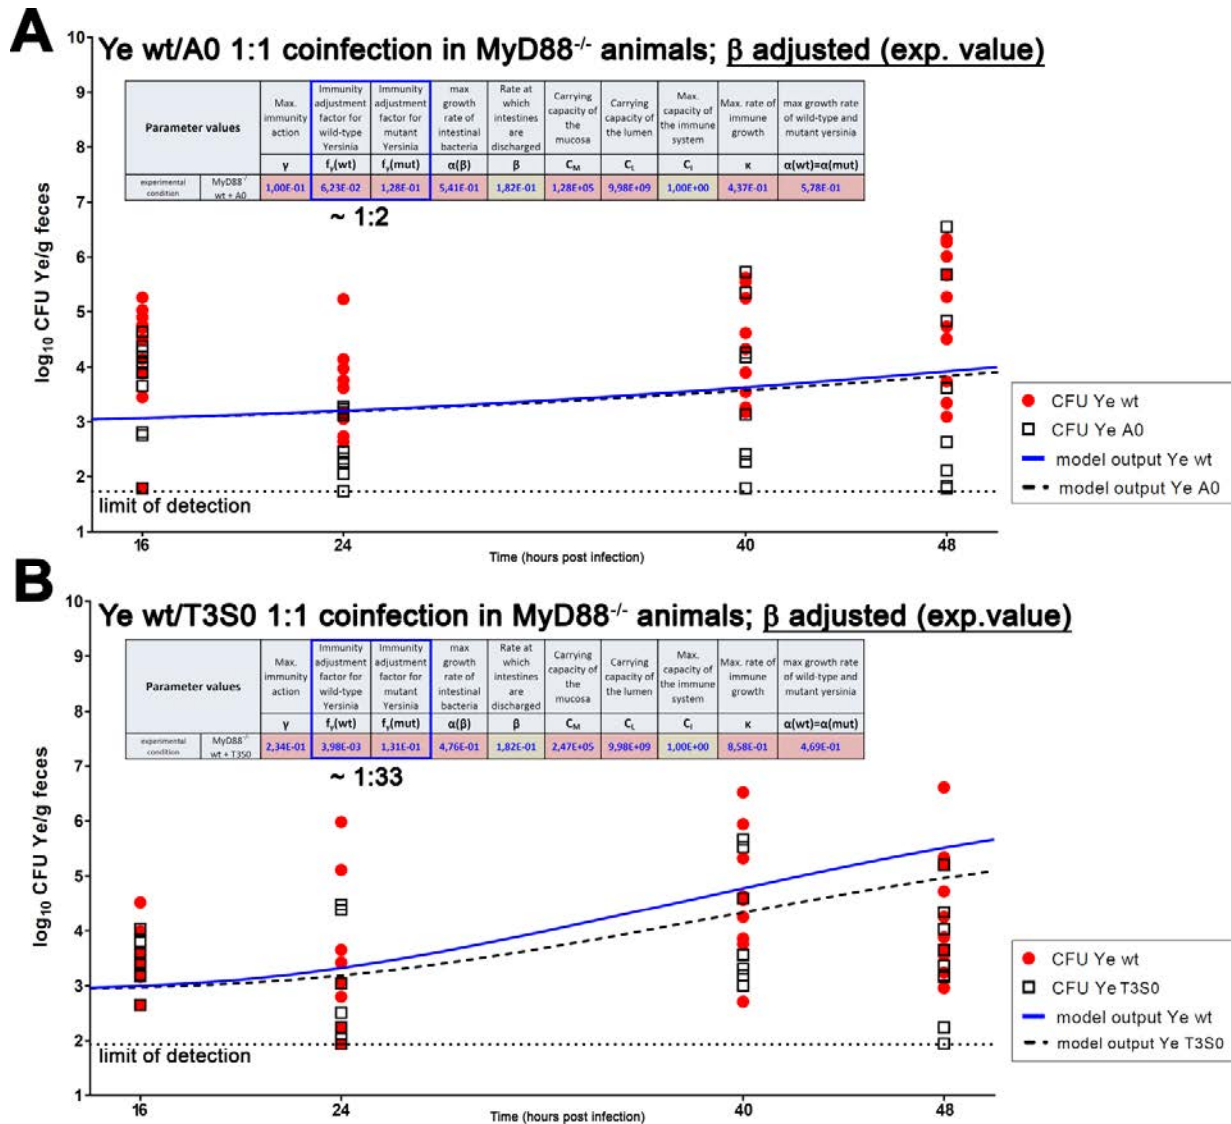

445

446

447 **Figure 6. Challenging the model part II: Impaired immune response (*MyD88<sup>-/-</sup>*)** (A) Overlay of model output  
 448 and experimentally determined CFU levels from coinfections of SPF *MyD88<sup>-/-</sup>* mice with Ye wt and Ye YadaA0 and  
 449 (B) Ye wt and Ye T3S0. All parameters were estimated based on the respective experimental data (parameter values  
 450 are listed in the inset table).

451 Due to the high frequency of fatal infections that has been observed with *Salmonella* Typhimurium and  
452 *Citrobacter rodentium* (Bhinder et al., 2014; Gibson et al., 2008; Hapfelmeier et al., 2005), infections with  
453 Ye were conducted for two days only. To get a better temporal resolution within this shorter observation  
454 period, the Ye counts in feces were determined at two additional time points (i.e., after 16 and 40 h).  
455 Within 48 hours post-infection, the CFU of Ye wt showed a slight increase compared to earlier time points  
456 but as expected never reached as high counts as we had observed in SPF wild type mice. The mean CFU  
457 of Ye YadA0 was marginally lower compared to that of Ye wt (**Fig. 6A**), whereas the difference in CFU  
458 of Ye wt compared to Ye T3S0 was more pronounced, but also subtle (**Fig. 6B**). In some of the *MyD88*<sup>-/-</sup>  
459 mice, the YadA0 and, to a lesser extent, the T3S0 strain reached a comparable, or even a higher CFU than  
460 the one of Ye wt strain at 48 hpi.

461 In summary, we found that (1) our model is appropriate to predict the infection course in  
462 immunocompromised animals, (2) that a proper immune response outreaches the importance of the  
463 presence of the microbiome in preventing colonization and infection with Ye, and (3) that both YadA and  
464 the T3SS seem to play only a minor role in the colonization of the GIT.

## 465 Discussion

466 The complex interplay of a specific pathogen with host factors, as well as the integrity and composition of  
467 the endogenous microbiome, determines the outcome of a gastrointestinal infection. Herein, we developed  
468 a model to simulate the dynamics of bacterial populations in enteropathogenic infection and to predict the  
469 infection course.

470 Our main findings are that the model can predict the infection course in different host settings (immune-  
471 competent host with a diverse microbiota, no microbiota, immunocompromised). However, each setting  
472 involves its own distinct parameter set. To predict the infection course reliably, it was not enough to alter  
473 individual parameters to adopt a change implied by a specific condition (e.g., no microbiota present). Only  
474 if parameter values were optimized based on the respective experimental dataset, the predictions were in  
475 good agreement with our experimental observations. Presumably, the differences in structural and

476 functional details (e.g., GIT morphology and physiology, gut passage time), even in our basic  
477 experimental setting (comparing SPF and GF animals) entail that the parameter values are not merely  
478 exchangeable between systems. Within consistent host condition and pathogen phenotype, however, the  
479 infection course can be predicted mathematically.

480 We conclude from our study that an excellent understanding of the causative agent of GIT infection is  
481 needed: How does the pathogen interact with the host? Does it produce specific virulence factors? How do  
482 these factors contribute to population dynamics (e.g., by mediating immune evasion)? Does the pathogen  
483 have specific requirements for growth (e.g., oxygen, nutrients)? These and many more questions need to  
484 be known or clarified experimentally in the best case. Consequently, our current model can in principle be  
485 used to predict the infection course of other pathogens, but needs to be adapted by concerning their  
486 specific peculiarities with regards to the above mentioned characteristics. Such adaptations might be easily  
487 done with pathogens that have a lifestyle comparable to that of *Ye*, but will require profound changes of  
488 the model setup for other pathogens.

489 To create a model that delivers rational predictions, we also need a good understanding of the infected  
490 host: is its microbiota able to mediate full colonization resistance? Was the microbiota already disturbed  
491 by medication? Is the immune system fully operable? Is the GIT physiology disturbed (leading to, e.g.,  
492 prolonged or impeded gut passage)? The more detailed our understanding of the pathogen and the host,  
493 the better the model can reflect biology.

494 In recent years, several mathematical models were developed to mirror bacterial gastrointestinal infections  
495 (Grant et al., 2008; Jones & Carlson, 2018; Kaiser et al., 2014; Kaiser et al., 2013; Leber et al., 2017;  
496 Verma et al., 2019), viral infections at epithelial sites (Miao et al., 2010), and inflammatory disorders such  
497 as IBD (Balbas-Martinez et al., 2018; Wendelsdorf et al., 2010). Our model emphasizes the trilateral  
498 relationship of the enteropathogen, the host and the microbiota. By enabling the modulation of pathogen  
499 and host specific properties, it significantly contributed to extend our knowledge about their role for the  
500 course of infection.



501 There are several aspects that should be included in more refined versions of our model: (I) A better  
502 reflection of the growth dynamics of both the pathogen and the microbiota within the GIT. Different  
503 approaches could resolve this issue (Grant et al., 2008; Jones & Carlson, 2018; Myhrvold et al., 2015;  
504 Simůnek et al., 2012; Stein et al., 2013). Other groups have addressed bacterial colonization dynamics in  
505 the intestines and translocation events after *Salmonella* Typhimurium infection. They parametrized their  
506 mathematical models with data from tagged isogenic *S. Typhimurium* strains (Grant et al., 2008; Kaiser et  
507 al., 2013; Moor et al., 2017). The adoption of this methodology to the Ye infection model could provide  
508 more detailed insights into the population dynamics at specific sites, such as the mucosal compartment.

509 Another desirable amendment of the model would be (II) the implementation of a more sophisticated  
510 immune system to increase the flexibility of the system. Several studies detailed the complex network of  
511 the host immune response that is activated by a given pathogen (Balbas-Martinez et al., 2018; Leber et al.,  
512 2017; Miao et al., 2010; Verma et al., 2019; Wendelsdorf et al., 2010). The results of these studies could  
513 be used for implementation, of course making the model system much more complicated.

514 In order to assess how well the model can be adapted to other pathogens, it would be desirable to  
515 investigate its performance in predicting the infection course of other clinically relevant species, such as  
516 enteropathogenic *E. coli*. However, this was beyond the scope of this study and needs to be investigated in  
517 the future, together with experts in the field having the required knowledge about the respective infection  
518 biology and the access to suitable animal infection models.

519 Finally, it would be great to include (IV) the possibility to reflect external perturbations such as the  
520 treatment of the host with specific antibiotics. This could possibly be achieved by integrating data about  
521 the resistance phenotype of the pathogen and the impact of changes in microbiota composition and  
522 colonization resistance. The dynamics of the intestinal microbiota composition have previously been  
523 addressed in modeling approaches, especially in the context of *Clostridium difficile* infection. Time-  
524 dependent metagenomics data were used to analyze the influence of antibiotic perturbations on microbiota  
525 and pathogen overgrowth *in silico* in an approach that combined a Lotka-Volterra model of population

526 dynamics and regression (Buffie et al., 2015; Stein et al., 2013). A recent extension of this model  
527 incorporated antibiotic resistance mutations and sporulation as further virulence attributes of *C. difficile*  
528 (Jones & Carlson, 2018). An adaption of this specific model could, in the future, lead to more elaborate  
529 model predictions in terms of microbiota perturbations due to antibiotics.

530 In sum, we think that computational modelling of infection has a great potential, but also many caveats. It  
531 is tempting to speculate whether at some point computational modeling could be used to predict the  
532 infection course of patients at risk and if such predictions could really be used to improve patient  
533 treatment and outcome. Main caveats are the huge complexity of the system “patient”, and also the  
534 plasticity of the causative pathogens. Of course, we are aware that our results using an animal model are  
535 merely transferrable to the human hosts. Still, we hope that with our study, demonstrating the feasibility  
536 and usefulness of infection modelling we have contributed a small piece to make this true in the far future.

## 537 **Materials & Methods**

### 538 **Bacterial strains and growth conditions**

539 Ye wt and mutant strains used in this study are listed in Supplementary **Table S10**. All strains were  
540 cultured overnight at 27°C in Luria Bertani broth (LB). As selective antibiotics nalidixic acid (10 µg/ml),  
541 kanamycin (50 µg/ml), spectinomycin (100 µg/ml) and chloramphenicol (25 µg/ml) (all Sigma-Aldrich)  
542 were supplemented in combinations according to the indicated resistances (**Table S10**). For the  
543 preparation of bacterial suspensions for oral infection, overnight cultures were diluted and subcultured for  
544 3 h at 27°C. Bacteria were then washed once with Dulbecco’s phosphate-buffered saline (DPBS, Gibco,  
545 Thermofisher) and the OD<sub>600</sub> was determined to prepare the desired inoculum.

### 546 **Generation of Ye strains containing different antibiotic selection markers**

547 A Chloramphenicol resistance cassette derived from pASK IBA4C (IBA Lifesciences) was  
548 chromosomally introduced into the YenI locus of the Ye WAC strain to discriminate between the Ye wt  
549 and the Ye Yada0 or the T3SS deficient strain (T3S0). The YenI gene encodes for a Ye specific

550 restriction-modification system the interruption of which allows higher efficiency of genetic  
551 manipulations (Antonenko et al., 2003; Miyahara et al., 1988). The resistance cassette was inserted by  
552 homologous recombination using the suicide plasmid pSB890Y as described previously (Weirich et al.,  
553 2017), and insertion was verified by PCR, antibiotic resistance testing and sequencing. Finally, the  
554 respective virulence plasmids were re-transformed into Ye WAC Cm<sup>R</sup>. All plasmids and primers used for  
555 the insertion of selection markers are listed in the Supplementary Tables S1 and S2.

### 556 **Animal handling**

557 Ethics statement: all animal infection experiments were approved by the regional authority of the state  
558 Baden-Württemberg in Tübingen (permission number H2/15). Female C57BL/6J OlaHsd mice were  
559 purchased from Envigo (Horst, NL). MyD88-deficient mice (*MyD88*<sup>-/-</sup>) with C57BL/6J genetic  
560 background were obtained from a local breeding colony (breeding pairs were purchased from Jackson  
561 Laboratories). Animals were housed in the animal facility of the University Hospital Tübingen under  
562 specific-pathogen-free (SPF) conditions. Germ-free (GF) animals were bred in the germ-free core facility  
563 of the University Hospital Tübingen or provided by the Institute for Laboratory Animal Science  
564 (Hannover Medical School, Germany). All animals were housed in individually ventilated cages in groups  
565 of 5 animals and were supplied with autoclaved food and drinking water *ad libitum*. Infection experiments  
566 were performed with female mice at 6-10 weeks of age.

### 567 **Oral mouse infection**

568 Prior to the intragastric administration of bacteria, mice were deprived of food and water for 3-4 hours.  
569 For oral coinfection experiments, animals were infected with a 1:1 mixture of each 2.5·10<sup>8</sup> CFU of Ye wt  
570 and Ye YadA0 or Ye T3S0, respectively. Upon oral coinfection, SPF wild type and GF mice were  
571 sacrificed at time points indicated within the figures describing the results of individual experiments.  
572 *MyD88*<sup>-/-</sup> mice were infected for two days only because of the expected rapid systemic spread in these  
573 immunocompromised animals. Oral infections for subsequent RNA analyses from small intestinal  
574 mucosal scrapings were performed for two days.

575 **Determination of bacterial load from feces**

576 Fresh fecal pellets were collected after manual stimulation of individual mice, weighed, and resuspended  
577 in 500 µl sterile DPBS. Pellets were homogenized, serially diluted with DPBS, plated on selective agar  
578 plates, and incubated at 27°C for 48 h. Afterwards colonies were counted, and the CFUs per gram of feces  
579 was calculated.

580 **Calculation of competitive indices in mixed infections**

581 Competitive indices (CI) from fecal and tissue samples were calculated as the CFU output of the Ye  
582 mutant/Ye wild type strain divided by the input (initial oral inoculum) of these strains (CFU Ye mutant  
583 strain input/CFU Ye wild type strain input) (Dyszal et al., 2010). The output was determined in the  
584 individual experiments as described above. The initial oral inocula (= the input) were verified by serial  
585 dilution and subsequent plating on LB with appropriate antibiotics. A CI with a logarithmic value of zero  
586 indicates identical fitness of the wild type and the mutant strain, while a negative CI indicates that the  
587 mutant strain is impaired in colonization (Dyszal et al., 2010).

588 **Isolation of RNA from gut mucosal scrapings**

589 For isolation of total RNA from gut mucosal scrapings, five mice per group harboring either SPF  
590 microbiome or GF and the genetic backgrounds indicated earlier were infected with a 1:1 mixture of each  
591  $2.5 \cdot 10^8$  CFU of Ye wt, and Ye T3S0. As controls, five mice of each colonization state and genetic  
592 background were orally administered with 100 µl PBS instead of bacterial suspensions. Two days after  
593 infection the mice were sacrificed and the distal 10 cm of the small intestine was dissected and shortly  
594 incubated in RNA later (Qiagen). Then the tissue was flushed with ice-cold DPBS to remove the fecal  
595 content and opened longitudinally on ice using scissors. After the removal of residual feces by flushing  
596 again with ice cold DPBS, the mucosa was scraped off with the blunt side of a scalpel and incubated  
597 overnight in RNA later at 4°C. RNA later was removed, and scrapings were homogenized in TRI-Reagent  
598 (Zymo Research) by rinsing them successively through syringe needles with decreasing diameters. The  
599 remaining cell debris was removed by centrifugation, and the supernatants were finally used for the RNA

600 purification using the DirectZol RNA Miniprep Plus Kit (Zymo Research) according to the manufacturer's  
601 protocol. This protocol included a step for the removal of contaminating genomic DNA. The resulting  
602 RNA was quantified using a Nanodrop photometer (Thermo Fisher), and the integrity was confirmed by  
603 agarose gel electrophoresis.

#### 604 **Quantification of immune parameters by quantitative real-time PCR (qRT-PCR) (Figure S2)**

605 Relative mRNA levels of target genes were determined using qRT-PCR. After an additional treatment for  
606 removal of genomic DNA included in the QuantiTect reverse transcription kit (Qiagen), mRNA was  
607 reverse transcribed according to the manufacturer's protocol using 1 µg of RNA as input for a 20 µl  
608 reaction. For subsequent qRT-PCR, the TaqMan gene expression master mix (Applied Biosystems; all  
609 assays are listed in suppl. Table S2) was used with thermal cycling conditions according to the  
610 manufacturer's protocol. cDNA input was 5 µl for a 20 µl PCR sample. Absolute quantifications were  
611 performed on a LightCycler 480 instrument (Roche) using the LightCycler 480 Software 1.5. Relative  
612 gene expression levels of target genes to the reference gene *beta-glucuronidase* (accession number  
613 AI747421) (Wang et al., 2010) were determined to apply kinetic PCR efficiency correction, according to  
614 the method of Pfaffl (Pfaffl, 2001) and normalized to the expression levels of uninfected SPF-colonized  
615 mice.

#### 616 **16S rRNA sequencing from SI luminal samples (Figure S3)**

617 For analysis of microbiota composition within the SI of mice and to assess changes in microbiota  
618 composition upon infection with Ye, mice were initially co-housed for ten days. After oral infection with  
619 Ye as described before, or after gavage of the same volume of DPBS, mice were sacrificed at the indicated  
620 time points. The entire GIT was dissected, and the SI was removed. Intestinal contents were isolated by  
621 gently squeezing them into tubes using sterile forceps. After that, the samples were immediately snap-  
622 frozen and stored at -80°C until DNA isolation. DNA was extracted as described in the international  
623 human microbiome project standard (IHMS) protocol H ([http://www.microbiome-standards.org/fileadmin/SOPs/IHMS\\_SOP\\_07\\_V2.pdf](http://www.microbiome-standards.org/fileadmin/SOPs/IHMS_SOP_07_V2.pdf)) (Godon et al., 1997; *IHMS Protocols*). Library

625 preparation and 16S rRNA amplicon sequencing were performed by the CeMet Company (Tübingen)  
626 using variable regions v3-v4. Paired-end sequencing was performed on the Illumina MiSeq platform  
627 (MiSeq Reagent Kit v3) with 600 cycles. Raw read quality control was done using the FastQC tool  
628 (<http://www.bioinformatics.babraham.ac.uk/projects/fastqc/>) ("Babraham Bioinformatics - FastQC A  
629 Quality Control tool for High Throughput Sequence Data,"). To this end, reads were merged and quality  
630 filtering was performed using USEARCH (Edgar, 2010). Taxonomy data annotation of sequences was  
631 done by comparison against the National Center for Biotechnology Information (NCBI) bacterial 16S  
632 rRNA database using MALT (Herbig et al.). Abundance tables at the taxonomic rank of interest were  
633 generated using MEGAN6 (Huson et al., 2016) and further analyzed using the software R ([http://www.R-](http://www.R-project.org/)  
634 [project.org](http://www.R-project.org/))(*R: The R Project for Statistical Computing*) ("R: The R Project for Statistical Computing,").  
635 Before statistical analysis, all samples were normalized to 14947 reads using the tool *rrarefy* which is part  
636 of the *vegan* package (Dixon, 2003). The *vegan* package diversity function was used to calculate Shannon  
637 diversity. An unpaired Wilcoxon sum rank test determined significant differences between groups.  
638 *Vegdist* and *prcomp* (also part of the *vegan* package) were used to perform principal component analysis  
639 (PCA) on Bray-Curtis dissimilarities. For the generation of graphical output, *ggplot2* (Gómez-Rubio,  
640 2017) was employed. 16S rRNA sequencing data will be published on the European Nucleotide Archive  
641 with the study accession number PRJEB37566.

#### 642 **Determination of the distribution of Ye along the mouse GIT (Figure S4)**

643 To determine the ratio of Ye and cultivable commensal bacteria in the different compartments of the GIT,  
644 three mice were orally infected with  $5 \cdot 10^8$  CFU of the Ye wt strain. Seven days after infection, mice were  
645 sacrificed, and the gut was dissected. A piece of 1 cm length directly adjacent to the stomach was  
646 removed, and the residual small intestine was split into three pieces of equal length: a proximal part (SI 1),  
647 a middle part (SI 2), and a distal part (SI 3). Additionally, the cecum and the colon were dissected. The  
648 contents of the three small intestinal pieces, the cecum, and the colon, were isolated by gently squeezing  
649 them into tubes using sterile forceps. For each compartment, the CFU per gram intestinal content was  
650 determined as described above for feces, using selective agar to determine Ye CFUs and brain heart

651 infusion agar (BHI; incubated in anaerobic pots) for determination of the approximate number of  
652 cultivable commensal bacteria.

### 653 **Systemic administration of gentamicin for cleansing of a potential niche colonized by Ye (Figure S5)**

654 In order to find out about the existence of extra-luminal Ye that drain into the lumen of the SI, we tested if  
655 the systemic administration of an antibiotic that can kill Ye but is not able to enter the lumen of the GIT  
656 might reduce the Ye burden in feces. To this end, 14 mice were coinfecting with Ye wt and Ye YadA0 for  
657 two days. At this time point, we assumed the successful colonization of a niche and high bacterial burden  
658 in the feces. Mice were then split into two groups, of which one was administered intraperitoneally 40  
659 mg/kg gentamicin (Ratiopharm) in 200  $\mu$ l 0.9 % sterile NaCl (Braun) and the other group sterile saline  
660 only. Ye CFUs were determined from feces of mice before gentamicin/saline administration (i.e., on 2  
661 dpi) and one day after treatment (i.e., on 3 dpi) as described above. On 3 dpi mice were sacrificed, and Ye  
662 CFUs were additionally determined from Peyer's patches.

### 663 **Determination of GIT passage time (Figure S6)**

664 SPF C57BL/6 wild type or *MyD88*<sup>-/-</sup> mice, as well as GF wild type mice (2 mice/group), were orally  
665 challenged with 100  $\mu$ l DPBS containing  $1 \cdot 10^9$  fluorescent polystyrene beads (1  $\mu$ m) (Thermo Fisher) plus  
666  $5 \cdot 10^8$  CFU Ye wt in order to simulate infection conditions. After the gavage, fecal pellets were collected  
667 hourly over 24 hours, weighed, snap-frozen, and stored at -20°C until analysis. Next, samples were  
668 homogenized in 1 ml PBS and debris was removed by a centrifugation step of 20 min with  $50 \times g$  (van der  
669 Waaij et al., 1994). To determine the number of fluorescent events per gram of feces, the resulting  
670 supernatant was spiked with a defined number of compensation beads (BD biosciences) in order to be able  
671 to determine the number of fluorescent beads in a defined volume by flow cytometry. The cumulated  
672 bead-hours were then calculated by multiplying the number of beads detected by the time spent in the gut  
673 until excretion. The mean residence time per bead was finally calculated by dividing the number of  
674 summarized events/g feces by the total bead-hours.



675 **Determination of water content of SI content and fecal pellets (Table S8)**

676 Three mice each, with either SPF microbiota or GF, were used for this experiment. Before dissection of  
677 the GI tract to determine the water content, 2-5 fecal pellets were collected. Then mice were sacrificed,  
678 and the entire GI tract was removed. Afterward, the stomach was discarded, and the small intestine was  
679 cut into two pieces of comparable length. Then the cecum and colon were dissected. All pieces and the  
680 fecal pellets were placed into individual, weighed Petri dishes. After that the wet weight of all samples  
681 was determined. The SI pieces, the cecum and colon were then cut open, and the content was scratched off  
682 and transferred into the Petri dish. The remaining emptied tissue was removed and weighed again, and the  
683 wet weight of the contents was determined. After that, the Petri dishes were placed without lids into an  
684 incubator, and the material was dried overnight at 65°C. Then all samples were weighed again to  
685 determine the dry weight. Finally, the total water content was calculated by subtracting the dry weight  
686 from the wet weight.

687 **Calculation of the thickening factor for SPF and GF mice**

688 Our model predicts the dynamics of the number of *Yersinia* (i.e., CFU) within the SI, whereas our  
689 experimental observations are based on colony counts derived from the plating of fecal pellets ( $\log_{10}$  CFU  
690 per g of feces). To align model output to experimental data, we determined the mean percentage of water  
691 in different sections of the gastrointestinal tract of SPF or GF mice and considered that the small intestinal  
692 content is massively concentrated to be excreted as a solid fecal pellet. Based on these data, we calculated  
693 a “thickening factor”. The content of the SI of SPF mice has a rather different percentage of water (77 %)   
694 compared to that of fecal pellets (29 %; **Table S8**). Therefore, the model predictions were multiplied with  
695 a correction factor in order to relate model output to laboratory observations. This factor is obtained by  
696 dividing the product of 1 g of fecal pellets and its content of solid matter (100 % - 29 %) by the product of  
697 the volume of SI content of SPF mice (which is about 2.3 g) and its content of solid matter (100 % - 77  
698 %), i.e., the factor is  $(1 \text{ g} \cdot 71 \%) / (2.3 \text{ g} \cdot 23 \%) \approx 1.3$ . Thus, our model output needs to be multiplied by  
699 1.3 before it can be compared with experimentally determined CFU levels. GF mice differ in several  
700 aspects of SPF mice. They have a massively enlarged intestine (we measured the volume of intestinal

701 contents to be about 10 g). The average water content of the fecal pellets is 49 % in these mice. Using the  
702 same calculation as above, we obtain a multiplication factor of  $(1 \text{ g} \cdot 51 \%) / (10 \text{ g} \cdot 23 \%) \approx 0.2$  for GF  
703 mice.

#### 704 **Alignment of model simulation and lab observation time**

705 We determined the passage of the GIT to take on average 4 h in SPF wild type mice, 5.5 h in *MyD88*<sup>-/-</sup>  
706 mice and 12 h in GF mice (**Fig. S6**). Assuming 1 h passage time in the stomach and 1 h in the colon, this  
707 leaves a sojourn time of 2 h (3.5 h in *MyD88*<sup>-/-</sup> mice and 10 h for GF) in the SI in which Ye are assumed to  
708 multiply. Our model only describes what is happening in the SI, starting when Ye leave the stomach (this  
709 corresponds to 1 hpi). Then an additional hour is needed for the colon passage until the CFUs can be  
710 counted. Thus, the observation in the laboratory at, e.g., 24 h after oral infection must be compared with  
711 the model results after 22 h of model simulation. This time shift of 2 h is taken into consideration  
712 whenever modeling results and experimental data are compared.

#### 713 **Parameter optimization**

714 We derived a 7-dimensional ordinary differential-equation system describing Ye population dynamics  
715 with seven and eight unknown parameter values (7 in SPF and 8 in both GF and *MyD88*<sup>-/-</sup>). These values  
716 were estimated by solving an optimization problem using the maximum likelihood method. The objective  
717 function was to minimize the Euclidean distance between measurements and model output (see Additional  
718 Files). Experimental values below the limit of detection (LOD) of the bacterial load per g feces in a given  
719 volume of fecal suspension were set to  $\log_{10}$  CFU/g feces of 2.05 (LOD in the experimental setting  
720 C57BL/6J wild type SPF) and run with integrated likelihood. The optimization problem was implemented  
721 using the bound-constrained optimization package FMINSEARCHBND in MATLAB 2019 (Mathworks  
722 Inc., Massachusetts) and executed on a laptop computer.

## 723 Acknowledgements

724 We thank André Bleich and Marijana Basic from the Institute for Laboratory Animal Science (Hannover  
725 Medical School) for providing GF animals. We thank Ulrich Schoppmeier for his great support with  
726 statistical analyses. We thank Tanja Späth for technical assistance and all members of the AG Yersinia for  
727 their uncomplicated and sustained willingness to support the experiments in a great team effort. Special  
728 thanks to Libera Lo Presti for critical reading of the manuscript, deliberate comments and language  
729 editing.

## 730 References

- 731 Antonenko, V., Pawlow, V., Heesemann, J., & Rakin, A. (2003, 2003/2/28). Characterization of a novel  
732 unique restriction-modification system from *Yersinia enterocolitica* O:8 1B. *FEMS Microbiol.*  
733 *Lett.*, 219(2), 249-252. [https://doi.org/10.1016/S0378-1097\(03\)00047-8](https://doi.org/10.1016/S0378-1097(03)00047-8)
- 734  
735 *Babraham Bioinformatics - FastQC A Quality Control tool for High Throughput Sequence Data.*  
736 <http://www.bioinformatics.babraham.ac.uk/projects/fastqc/>
- 737  
738 Balbas-Martinez, V., Ruiz-Cerda, L., Irurzun-Arana, I., Gonzalez-Garcia, I., Vermeulen, A., Gomez-  
739 Mantilla, J. D., & Troconiz, I. F. (2018). A systems pharmacology model for inflammatory bowel  
740 disease. *PLoS One*, 13(3), e0192949. <https://doi.org/10.1371/journal.pone.0192949>
- 741  
742 Bhinder, G., Stahl, M., Sham, H. P., Crowley, S. M., Morampudi, V., Dalwadi, U., Ma, C., Jacobson, K.,  
743 & Vallance, B. A. (2014, 2014/9). Intestinal epithelium-specific MyD88 signaling impacts host  
744 susceptibility to infectious colitis by promoting protective goblet cell and antimicrobial responses.  
745 *Infect. Immun.*, 82(9), 3753-3763. <https://doi.org/10.1128/IAI.02045-14>
- 746  
747 Buffie, C. G., Bucci, V., Stein, R. R., McKenney, P. T., Ling, L., Gobourne, A., No, D., Liu, H.,  
748 Kinnebrew, M., Viale, A., Littmann, E., van den Brink, M. R. M., Jenq, R. R., Taur, Y., Sander,  
749 C., Cross, J. R., Toussaint, N. C., Xavier, J. B., & Pamer, E. G. (2015, 2015/1/8). Precision  
750 microbiome reconstitution restores bile acid mediated resistance to *Clostridium difficile*. *Nature*,  
751 517(7533), 205-208. <https://doi.org/10.1038/nature13828>
- 752  
753 Chelliah, V., Juty, N., Ajmera, I., Ali, R., Dumousseau, M., Glont, M., Hucka, M., Jalowicki, G., Keating,  
754 S., Knight-Schrijver, V., Lloret-Villas, A., Natarajan, K. N., Pettit, J.-B., Rodriguez, N., Schubert,  
755 M., Wimalaratne, S. M., Zhao, Y., Hermjakob, H., Le Novère, N., & Laibe, C. (2015, 2015/1).  
756 BioModels: ten-year anniversary. *Nucleic Acids Res.*, 43(Database issue), D542-548.  
757 <https://doi.org/10.1093/nar/gku1181>

758

- 759 Cornelis, G. R. (2002, 2002/8/5). *Yersinia* type III secretion: send in the effectors. *J. Cell Biol.*, 158(3),  
760 401-408. <https://doi.org/10.1083/jcb.200205077>
- 761  
762 Dautzenberg, M. J., Wekesa, A. N., Gniadkowski, M., Antoniadou, A., Giamarellou, H., Petrikkos, G. L.,  
763 Skiada, A., Brun-Buisson, C., Bonten, M. J., Derde, L. P., & Mastering h, O. A. R. i. E. W. P. S.  
764 T. (2015, Jun). The association between colonization with carbapenemase-producing  
765 enterobacteriaceae and overall ICU mortality: an observational cohort study. *Crit Care Med*,  
766 43(6), 1170-1177. <https://doi.org/10.1097/CCM.0000000000001028>
- 767  
768 Dave, M. N., Silva, J. E., Eliçabe, R. J., Jeréz, M. B., Filippa, V. P., Gorlino, C. V., Autenrieth, S.,  
769 Autenrieth, I. B., & Di Genaro, M. S. (2016, 2016). *Yersinia enterocolitica* YopH-Deficient Strain  
770 Activates Neutrophil Recruitment to Peyer's Patches and Promotes Clearance of the Virulent  
771 Strain. *Infection and Immunity*, 84(11), 3172-3181. <https://doi.org/10.1128/iai.00568-16>
- 772  
773 Demarre, G., Guérout, A.-M., Matsumoto-Mashimo, C., Rowe-Magnus, D. A., Marlière, P., & Mazel, D.  
774 (2005, 2005/3). A new family of mobilizable suicide plasmids based on broad host range R388  
775 plasmid (IncW) and RP4 plasmid (IncPalpha) conjugative machineries and their cognate  
776 *Escherichia coli* host strains. *Res. Microbiol.*, 156(2), 245-255.  
777 <https://doi.org/10.1016/j.resmic.2004.09.007>
- 778  
779 Di Genaro, M. S., Waidmann, M., Kramer, U., Hitziger, N., Bohn, E., & Autenrieth, I. B. (2003, 2003/4).  
780 Attenuated *Yersinia enterocolitica* mutant strains exhibit differential virulence in cytokine-  
781 deficient mice: implications for the development of novel live carrier vaccines. *Infect. Immun.*,  
782 71(4), 1804-1812. <https://doi.org/10.1128/iai.71.4.1804-1812.2003>
- 783  
784 Dixon, P. (2003, 2003). VEGAN, a package of R functions for community ecology. *Journal of Vegetation*  
785 *Science*, 14(6), 927-930. <https://doi.org/10.1111/j.1654-1103.2003.tb02228.x>
- 786  
787 Dyszel, J. L., Smith, J. N., Lucas, D. E., Soares, J. A., Swearingen, M. C., Vross, M. A., Young, G. M., &  
788 Ahmer, B. M. M. (2010, 2010/1). *Salmonella enterica* serovar Typhimurium can detect acyl  
789 homoserine lactone production by *Yersinia enterocolitica* in mice. *J. Bacteriol.*, 192(1), 29-37.  
790 <https://doi.org/10.1128/JB.01139-09>
- 791  
792 Edgar, R. C. (2010, 2010/10/1). Search and clustering orders of magnitude faster than BLAST.  
793 *Bioinformatics*, 26(19), 2460-2461. <https://doi.org/10.1093/bioinformatics/btq461>
- 794  
795 El Tahir, Y., & Skurnik, M. (2001, 2001/8). YadA, the multifaceted *Yersinia* adhesin. *Int. J. Med.*  
796 *Microbiol.*, 291(3), 209-218. <https://doi.org/10.1078/1438-4221-00119>
- 797  
798 Friedrich, C., Mamareli, P., Thiemann, S., Kruse, F., Wang, Z., Holzmann, B., Strowig, T., Sparwasser,  
799 T., & Lochner, M. (2017, 2017). MyD88 signaling in dendritic cells and the intestinal epithelium  
800 controls immunity against intestinal infection with *C. rodentium*. *PLOS Pathogens*, 13(5),  
801 e1006357. <https://doi.org/10.1371/journal.ppat.1006357>

802

- 803 Gibson, D. L., Ma, C., Bergstrom, K. S. B., Huang, J. T., Man, C., & Vallance, B. A. (2008, 2008).  
804 MyD88 signalling plays a critical role in host defence by controlling pathogen burden and  
805 promoting epithelial cell homeostasis during *Citrobacter rodentium*-induced colitis. *Cellular*  
806 *Microbiology*, 10(3), 618-631. <https://doi.org/10.1111/j.1462-5822.2007.01071.x>
- 807  
808 Godon, J. J., Zumstein, E., Dabert, P., Habouzit, F., & Moletta, R. (1997, 1997/7). Molecular microbial  
809 diversity of an anaerobic digester as determined by small-subunit rDNA sequence analysis. *Appl.*  
810 *Environ. Microbiol.*, 63(7), 2802-2813. <https://www.ncbi.nlm.nih.gov/pubmed/9212428>
- 811 <https://www.ncbi.nlm.nih.gov/pmc/articles/PMC168577>
- 812 <http://aem.asm.org/cgi/pmidlookup?view=long&pmid=9212428>
- 813  
814 Gómez-Rubio, V. (2017, 2017). ggplot2 - Elegant Graphics for Data Analysis (2nd Edition). *Journal of*  
815 *Statistical Software*, 77(Book Review 2). <https://doi.org/10.18637/jss.v077.b02>
- 816  
817 Grant, A. J., Restif, O., McKinley, T. J., Sheppard, M., Maskell, D. J., & Mastroeni, P. (2008, 2008/4/8).  
818 Modelling within-host spatiotemporal dynamics of invasive bacterial disease. *PLoS Biol.*, 6(4),  
819 e74. <https://doi.org/10.1371/journal.pbio.0060074>
- 820  
821 Guthrie, L., & Kelly, L. (2019, Jun). Bringing microbiome-drug interaction research into the clinic.  
822 *EBioMedicine*, 44, 708-715. <https://doi.org/10.1016/j.ebiom.2019.05.009>
- 823  
824 Handley, S. A., Dube, P. H., Revell, P. A., & Miller, V. L. (2004, 2004/3). Characterization of oral  
825 *Yersinia enterocolitica* infection in three different strains of inbred mice. *Infect. Immun.*, 72(3),  
826 1645-1656. <https://doi.org/10.1128/iai.72.3.1645-1656.2004>
- 827  
828 Hapfelmeier, S., Stecher, B., Barthel, M., Kremer, M., Müller, A. J., Heikenwalder, M., Stallmach, T.,  
829 Hensel, M., Pfeffer, K., Akira, S., & Hardt, W.-D. (2005, 2005/2/1). The *Salmonella*  
830 pathogenicity island (SPI)-2 and SPI-1 type III secretion systems allow *Salmonella* serovar  
831 typhimurium to trigger colitis via MyD88-dependent and MyD88-independent mechanisms. *J.*  
832 *Immunol.*, 174(3), 1675-1685. <https://doi.org/10.4049/jimmunol.174.3.1675>
- 833  
834 Heesemann, J. (1987, 1987). Chromosomal-encoded siderophores are required for mouse virulence of  
835 enteropathogenic *Yersinia* species. *FEMS Microbiology Letters*, 48(1-2), 229-233.  
836 <https://doi.org/10.1111/j.1574-6968.1987.tb02547.x>
- 837  
838 Herbig, A., Maixner, F., Bos, K. I., Zink, A., Krause, J., & Huson, D. H. MALT: Fast alignment and  
839 analysis of metagenomic DNA sequence data applied to the Tyrolean Iceman.  
840 <https://doi.org/10.1101/050559>
- 841  
842 Herrero, M., de Lorenzo, V., & Timmis, K. N. (1990, 1990/11). Transposon vectors containing non-  
843 antibiotic resistance selection markers for cloning and stable chromosomal insertion of foreign  
844 genes in gram-negative bacteria. *J. Bacteriol.*, 172(11), 6557-6567.  
845 <https://doi.org/10.1128/jb.172.11.6557-6567.1990>

- 846  
847 Huson, D. H., Beier, S., Flade, I., Górska, A., El-Hadidi, M., Mitra, S., Ruscheweyh, H.-J., & Tappu, R.  
848 (2016, 2016/6). MEGAN Community Edition - Interactive Exploration and Analysis of Large-  
849 Scale Microbiome Sequencing Data. *PLoS Comput. Biol.*, *12*(6), e1004957.  
850 <https://doi.org/10.1371/journal.pcbi.1004957>
- 851  
852 *IHMS Protocols*. [http://www.microbiome-standards.org/fileadmin/SOPs/IHMS\\_SOP\\_07\\_V2.pdf](http://www.microbiome-standards.org/fileadmin/SOPs/IHMS_SOP_07_V2.pdf)
- 853  
854 Jia, H., Li, L., Li, W., Hou, T., Ma, H., Yang, Y., Wu, A., Liu, Y., Wen, J., Yang, H., Luo, X., Xing, Y.,  
855 Zhang, W., Wu, Y., Ding, L., Liu, W., Lin, L., Li, Y., & Chen, M. (2019). Impact of Healthcare-  
856 Associated Infections on Length of Stay: A Study in 68 Hospitals in China. *Biomed Res Int*, *2019*,  
857 2590563. <https://doi.org/10.1155/2019/2590563>
- 858  
859 Jones, E. W., & Carlson, J. M. (2018, Feb). *In silico* analysis of antibiotic-induced *Clostridium difficile*  
860 infection: Remediation techniques and biological adaptations. *PLoS Comput Biol*, *14*(2),  
861 e1006001. <https://doi.org/10.1371/journal.pcbi.1006001>
- 862  
863 Kaiser, P., Regoes, R. R., Dolowschiak, T., Wotzka, S. Y., Lengefeld, J., Slack, E., Grant, A. J.,  
864 Ackermann, M., & Hardt, W. D. (2014, Feb). Cecum lymph node dendritic cells harbor slow-  
865 growing bacteria phenotypically tolerant to antibiotic treatment. *PLoS Biol*, *12*(2), e1001793.  
866 <https://doi.org/10.1371/journal.pbio.1001793>
- 867  
868 Kaiser, P., Slack, E., Grant, A. J., Hardt, W. D., & Regoes, R. R. (2013, Sep). Lymph node colonization  
869 dynamics after oral *Salmonella* Typhimurium infection in mice. *PLoS Pathog*, *9*(9), e1003532.  
870 <https://doi.org/10.1371/journal.ppat.1003532>
- 871  
872 Lebeis, S. L., Bommarius, B., Parkos, C. A., Sherman, M. A., & Kalman, D. (2007, 2007/7/1). TLR  
873 signaling mediated by MyD88 is required for a protective innate immune response by neutrophils  
874 to *Citrobacter rodentium*. *J. Immunol.*, *179*(1), 566-577.  
875 <https://doi.org/10.4049/jimmunol.179.1.566>
- 876  
877 Leber, A., Hontecillas, R., Abedi, V., Tubau-Juni, N., Zoccoli-Rodriguez, V., Stewart, C., & Bassaganya-  
878 Riera, J. (2017, May). Modeling new immunoregulatory therapeutics as antimicrobial alternatives  
879 for treating *Clostridium difficile* infection. *Artif Intell Med*, *78*, 1-13.  
880 <https://doi.org/10.1016/j.artmed.2017.05.003>
- 881  
882 Lupp, C., Robertson, M. L., Wickham, M. E., Sekirov, I., Champion, O. L., Gaynor, E. C., & Finlay, B. B.  
883 (2007, 2007/9/13). Host-mediated inflammation disrupts the intestinal microbiota and promotes  
884 the overgrowth of *Enterobacteriaceae*. *Cell Host Microbe*, *2*(3), 204.  
885 <https://doi.org/10.1016/j.chom.2007.08.002>
- 886  
887 Macpherson, A. J., & Harris, N. L. (2004, Jun). Interactions between commensal intestinal bacteria and  
888 the immune system. *Nat Rev Immunol*, *4*(6), 478-485. <https://doi.org/10.1038/nri1373>
- 889



- 890 Miao, H., Hollenbaugh, J. A., Zand, M. S., Holden-Wiltse, J., Mosmann, T. R., Perelson, A. S., Wu, H., &  
891 Topham, D. J. (2010, 2010/7). Quantifying the early immune response and adaptive immune  
892 response kinetics in mice infected with influenza A virus. *J. Virol.*, *84*(13), 6687-6698.  
893 <https://doi.org/10.1128/JVI.00266-10>
- 894  
895 Miyahara, M., Maruyama, T., Wake, A., & Mise, K. (1988, 1988/2). Widespread occurrence of the  
896 restriction endonuclease YenI, an isoschizomer of PstI, in *Yersinia enterocolitica* serotype O8.  
897 *Appl. Environ. Microbiol.*, *54*(2), 577-580. <https://www.ncbi.nlm.nih.gov/pubmed/2833162>  
898 <https://www.ncbi.nlm.nih.gov/pmc/articles/PMC202495>  
899 <http://aem.asm.org/cgi/pmidlookup?view=long&pmid=2833162>
- 900  
901 Moor, K., Diard, M., Sellin, M. E., Felmy, B., Wotzka, S. Y., Toska, A., Bakkeren, E., Arnoldini, M.,  
902 Bansept, F., Co, A. D., Völler, T., Minola, A., Fernandez-Rodriguez, B., Agatic, G., Barbieri, S.,  
903 Piccoli, L., Casiraghi, C., Corti, D., Lanzavecchia, A., Regoes, R. R., Loverdo, C., Stocker, R.,  
904 Brumley, D. R., Hardt, W.-D., & Slack, E. (2017, 2017/4/27). High-avidity IgA protects the  
905 intestine by enchainning growing bacteria. *Nature*, *544*(7651), 498-502.  
906 <https://doi.org/10.1038/nature22058>
- 907  
908 Myhrvold, C., Kotula, J. W., Hicks, W. M., Conway, N. J., & Silver, P. A. (2015, 2015/11/30). A  
909 distributed cell division counter reveals growth dynamics in the gut microbiota. *Nat. Commun.*, *6*,  
910 10039. <https://doi.org/10.1038/ncomms10039>
- 911  
912 OECD/European Union Paris/European Union, B. ((2018)). Healthcare-associated infections. *Health at a*  
913 *Glance: Europe 2018: State of Health in the EU Cycle*.  
914 [https://doi.org/https://doi.org/10.1787/health\\_glance\\_eur-2018-45-en](https://doi.org/https://doi.org/10.1787/health_glance_eur-2018-45-en) (OECD Publishing)
- 915  
916 Pepe, J. C., Wachtel, M. R., Wagar, E., & Miller, V. L. (1995, 1995). Pathogenesis of defined invasion  
917 mutants of *Yersinia enterocolitica* in a BALB/c mouse model of infection. *Infection and*  
918 *Immunity*, *63*(12), 4837-4848. <https://doi.org/10.1128/iai.63.12.4837-4848.1995>
- 919  
920 Pfaffl, M. W. (2001, 2001/5/1). A new mathematical model for relative quantification in real-time RT-  
921 PCR. *Nucleic Acids Res.*, *29*(9), e45. <https://doi.org/10.1093/nar/29.9.e45>
- 922  
923 *R: The R Project for Statistical Computing*. <http://www.R-project.org>
- 924  
925 Roggenkamp, A., Neuberger, H. R., Flügel, A., Schmoll, T., & Heesemann, J. (1995, 1995/6). Substitution  
926 of two histidine residues in YadA protein of *Yersinia enterocolitica* abrogates collagen binding,  
927 cell adherence and mouse virulence. *Mol. Microbiol.*, *16*(6), 1207-1219.  
928 <https://doi.org/10.1111/j.1365-2958.1995.tb02343.x>
- 929  
930 Round, J. L., & Mazmanian, S. K. (2009, 2009/5). The gut microbiota shapes intestinal immune responses  
931 during health and disease. *Nat. Rev. Immunol.*, *9*(5), 313-323. <https://doi.org/10.1038/nri2515>



- 932  
933 Ruckdeschel, K., Roggenkamp, A., Schubert, S., & Heesemann, J. (1996, 1996/3). Differential  
934 contribution of *Yersinia enterocolitica* virulence factors to evasion of microbicidal action of  
935 neutrophils. *Infect. Immun.*, *64*(3), 724-733. <https://www.ncbi.nlm.nih.gov/pubmed/8641773>  
936 <https://www.ncbi.nlm.nih.gov/pmc/articles/PMC173829>  
937 <http://iai.asm.org/cgi/pmidlookup?view=long&pmid=8641773>
- 938  
939 Schütz, M., Weiss, E. M., Schindler, M., Hallstrom, T., Zipfel, P. F., Linke, D., & Autenrieth, I. B. (2010,  
940 2010). Trimer Stability of YadA Is Critical for Virulence of *Yersinia enterocolitica*. *Infection and*  
941 *Immunity*, *78*(6), 2677-2690. <https://doi.org/10.1128/iai.01350-09>
- 942  
943 Shameer, K., Readhead, B., & Dudley, J. T. (2015). Computational and experimental advances in drug  
944 repositioning for accelerated therapeutic stratification. *Curr Top Med Chem*, *15*(1), 5-20.  
945 <https://doi.org/10.2174/1568026615666150112103510>
- 946  
947 Simůnek, J., Brandysová, V., Koppová, I., & Simůnek, J., Jr. (2012, 2012/7). The antimicrobial action of  
948 chitosan, low molar mass chitosan, and chitoooligosaccharides on human colonic bacteria. *Folia*  
949 *Microbiol.*, *57*(4), 341-345. <https://doi.org/10.1007/s12223-012-0138-1>
- 950  
951 Stecher, B., Robbiani, R., Walker, A. W., Westendorf, A. M., Barthel, M., Kremer, M., Chaffron, S.,  
952 Macpherson, A. J., Buer, J., Parkhill, J., Dougan, G., von Mering, C., & Hardt, W.-D. (2007,  
953 2007/10). *Salmonella enterica* serovar typhimurium exploits inflammation to compete with the  
954 intestinal microbiota. *PLoS Biol.*, *5*(10), 2177-2189. <https://doi.org/10.1371/journal.pbio.0050244>
- 955  
956 Stein, R. R., Bucci, V., Toussaint, N. C., Buffie, C. G., Räscht, G., Pamer, E. G., Sander, C., & Xavier, J.  
957 B. (2013, 2013/12/12). Ecological modeling from time-series inference: insight into dynamics and  
958 stability of intestinal microbiota. *PLoS Comput. Biol.*, *9*(12), e1003388.  
959 <https://doi.org/10.1371/journal.pcbi.1003388>
- 960  
961 Toh, T. S., Dondelinger, F., & Wang, D. (2019, Sep). Looking beyond the hype: Applied AI and machine  
962 learning in translational medicine. *EBioMedicine*, *47*, 607-615.  
963 <https://doi.org/10.1016/j.ebiom.2019.08.027>
- 964  
965 van der Waaij, L. A., Mesander, G., Limburg, P. C., & van der Waaij, D. (1994, 1994/7/1). Direct flow  
966 cytometry of anaerobic bacteria in human feces. *Cytometry*, *16*(3), 270-279.  
967 <https://doi.org/10.1002/cyto.990160312>
- 968  
969 Verma, M., Bassaganya-Riera, J., Leber, A., Tubau-Juni, N., Hoops, S., Abedi, V., Chen, X., &  
970 Hontecillas, R. (2019, Jun 1). High-resolution computational modeling of immune responses in  
971 the gut. *Gigascience*, *8*(6). <https://doi.org/10.1093/gigascience/giz062>
- 972

- 973 Wang, F., Wang, J., Liu, D., & Su, Y. (2010, 2010/4/15). Normalizing genes for real-time polymerase  
974 chain reaction in epithelial and nonepithelial cells of mouse small intestine. *Anal. Biochem.*,  
975 399(2), 211-217. <https://doi.org/10.1016/j.ab.2009.12.029>
- 976  
977 Weirich, J., Bräutigam, C., Mühlenkamp, M., Franz-Wachtel, M., Macek, B., Meuskens, I., Skurnik, M.,  
978 Leskinen, K., Bohn, E., Autenrieth, I., & Schütz, M. (2017, 2017/10/3). Identifying components  
979 required for OMP biogenesis as novel targets for antiinfective drugs. *Virulence*, 8(7), 1170-1188.  
980 <https://doi.org/10.1080/21505594.2016.1278333>
- 981  
982 Wendelsdorf, K., Bassaganya-Riera, J., Hontecillas, R., & Eubank, S. (2010, 2010/6/21). Model of colonic  
983 inflammation: immune modulatory mechanisms in inflammatory bowel disease. *J. Theor. Biol.*,  
984 264(4), 1225-1239. <https://doi.org/10.1016/j.jtbi.2010.03.027>
- 985

986 **Supplementary Information**

987

988

989

990

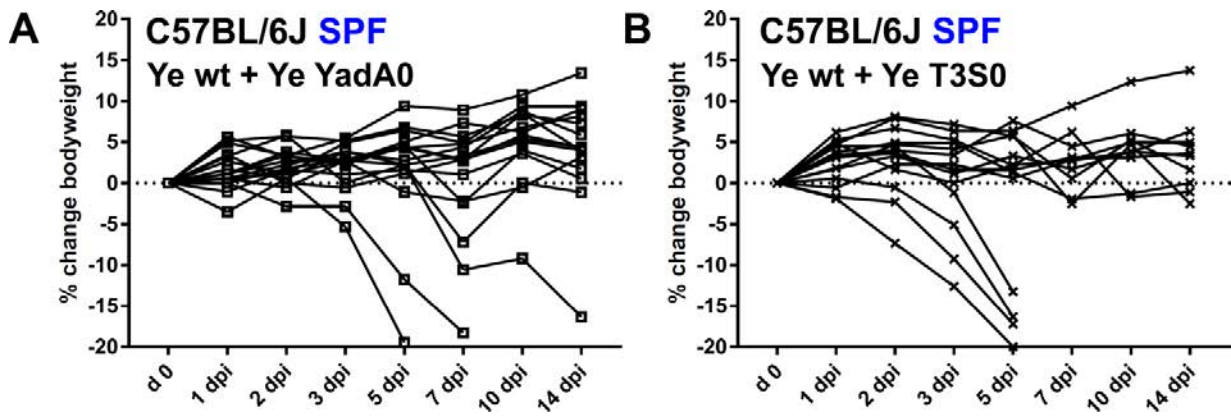

991

992

993

994

995

996 **Figure S1. Mouse bodyweight development during Ye coinfection.** The bodyweight development of mice during  
997 the infection course was monitored as a marker of the severity of the infection. Percent changes compared to initial  
998 bodyweight at different time points are illustrated. **(A)** Change of bodyweight of SPF-colonized C57BL/6J mice after  
999 1:1 coinfection with Ye wt and Ye YadA0 and **(B)** with Ye wt and Ye T3S0. As some mice in these coinfections lost  
1000 significant weight and had to be sacrificed between 5 and 7 dpi, the individual bodyweight developments are shown.

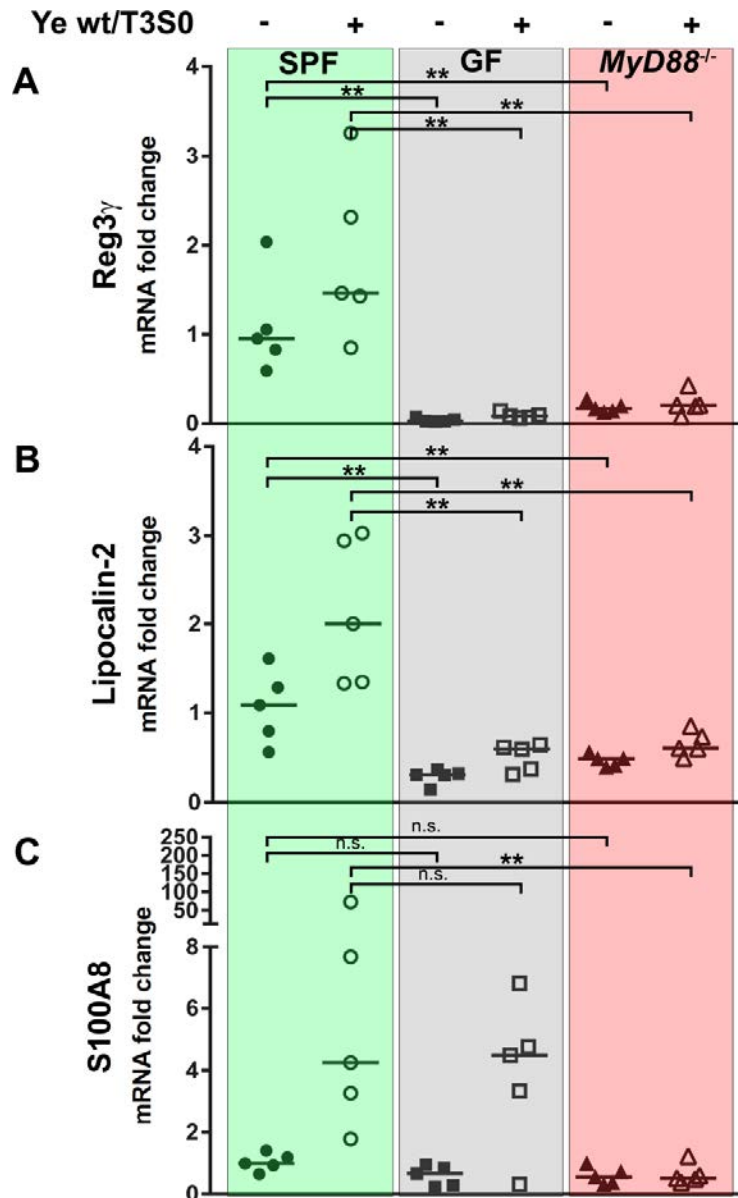

1001

1002 **Figure S2. Relative quantification of mRNA levels of Reg3 $\gamma$ , Lipocalin-2 and S100A8 from mucosal scrapings**  
 1003 **as indicators of intestinal inflammation.** Relative expression levels compared to the housekeeping gene beta-  
 1004 glucuronidase were determined by qRT-PCR in mock-infected and mice co-infected for two days with Ye wt/Ye  
 1005 T3S0. **(A)** Basal expression levels and expression levels of Reg3 $\gamma$  following infection of SPF wild type mice, GF  
 1006 animals, and SPF-colonized *MyD88<sup>-/-</sup>* mice. **(B)** Expression levels of Lipocalin-2 **(C)** Expression levels of S100A8.  
 1007 Statistical significant differences between groups were determined by a nonparametric Mann-Whitney test. \*\* *P* <  
 1008 0.01.

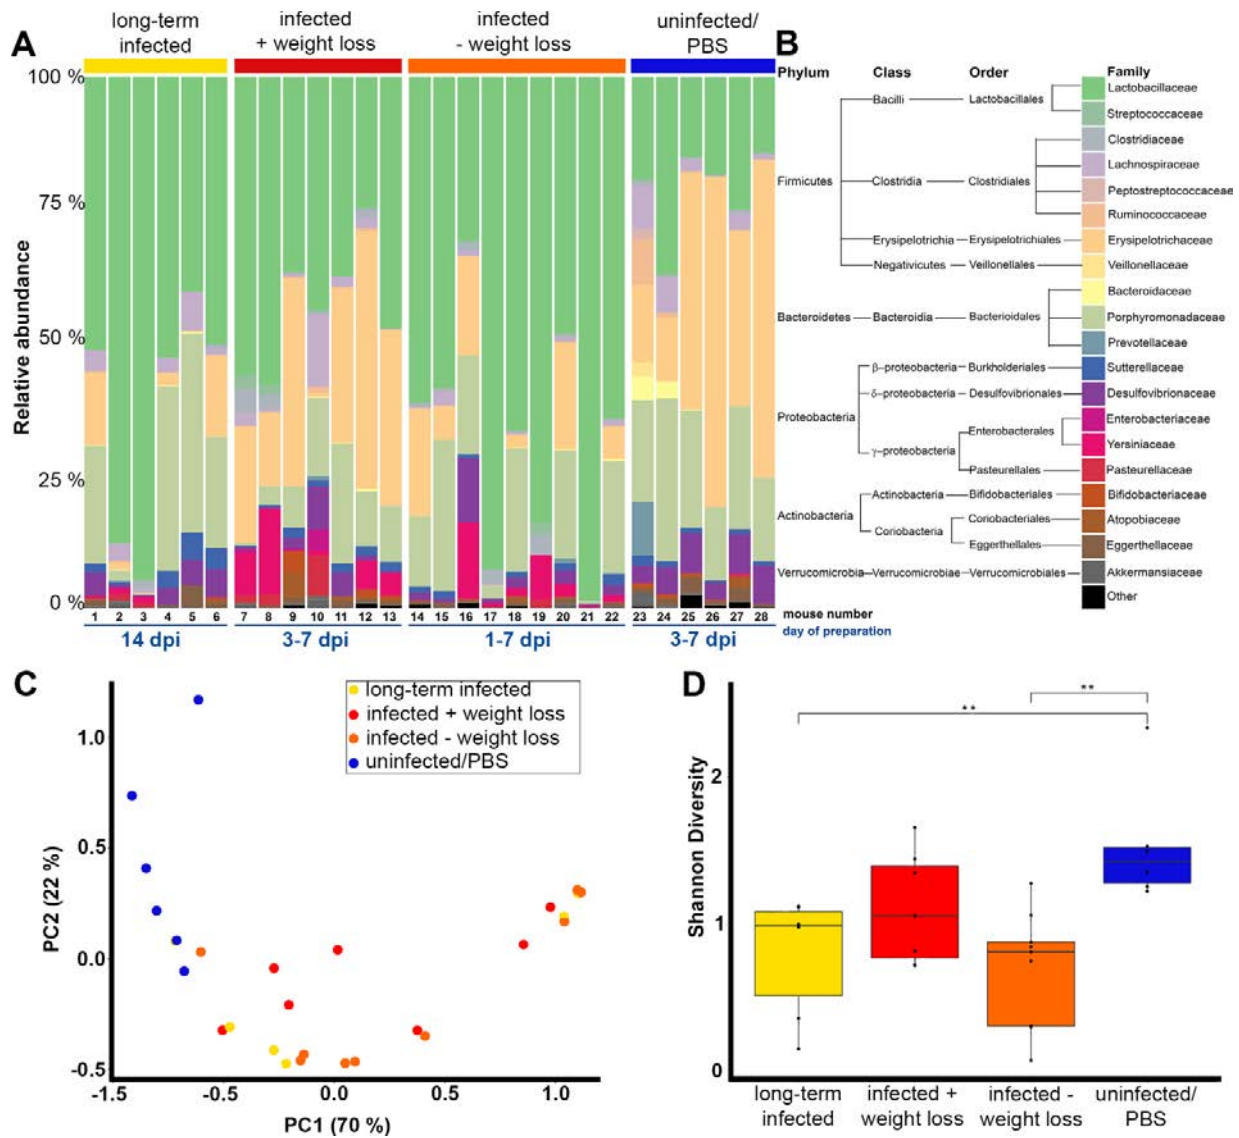

1009

1010 **Figure S3. Impact of Ye infection on SI microbiome composition.** Microbial composition of SI contents of mice  
 1011 with different infection outcomes, as assessed by 16S rRNA sequencing. (A) Relative abundances of microbiota  
 1012 representatives on the family level. Samples were isolated from the SI after oral Ye wt infection. Relative  
 1013 abundances of families are shown in stacked bar charts for individual animals. Data were grouped according to the  
 1014 observed change of body weight at earlier time points (weight loss after 3-7 days (red), no weight loss between 1 dpi  
 1015 and 7 dpi (orange), or uninfected control group (blue)). Long-term infected mice returned to a kind of a steady-state at  
 1016 a late time point of infection and had no signs of sickness anymore (yellow). (B) Taxonomic tree on the phylum-,  
 1017 class-, order- and family-level allowing the assignment of the color code used in (A). (C) Principal component  
 1018 analysis (PC) on Bray-Curtis dissimilarities of the microbial composition of samples. Color code reflects

45

1019 assignments to groups as in (A). (D) Impact of Ye infection on microbial diversity. Shannon diversity of the SI  
1020 microbiome composition in the different groups of animals. Statistically significant differences were identified using  
1021 an unpaired Wilcoxon sum rank test. \*\* P < 0.001.

1022

1023

1024

1025

1026

1027

1028

1029

1030

1031

1032

1033

1034

1035

1036

1037

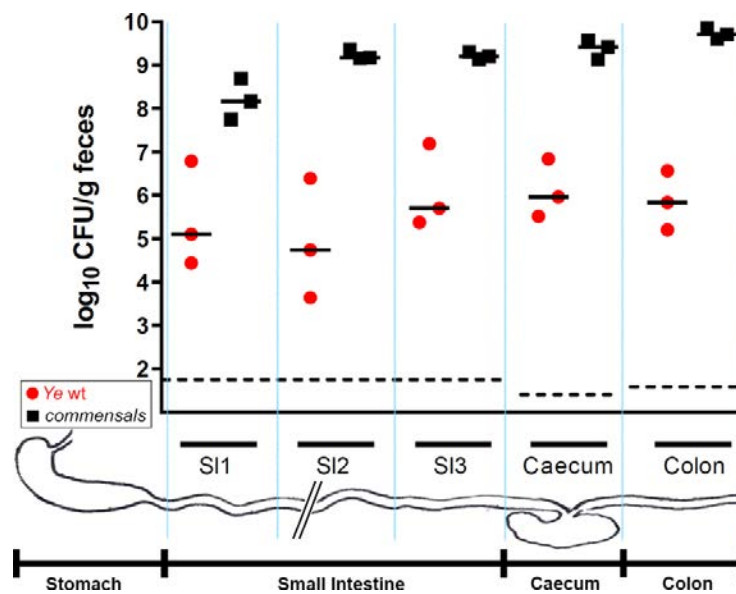

1038 **Figure S4. Distribution of Ye and cultivable commensals along the GIT and water content of GI tract sections**

1039 **and fecal pellets. (A)** At 7 dpi after oral infection of SPF-colonized C57BL/6J mice with the Ye wt strain, the

1040 numbers of Ye and cultivable commensals were determined in different compartments of the GIT. The small

1041 intestine was dissected and cut into three pieces of equal length (SI1, SI2, SI3). Additionally, the caecum and the

1042 colon were dissected. CFUs per gram of fecal content of the three SI pieces and of the caecum and the colon were

1043 determined by plating.



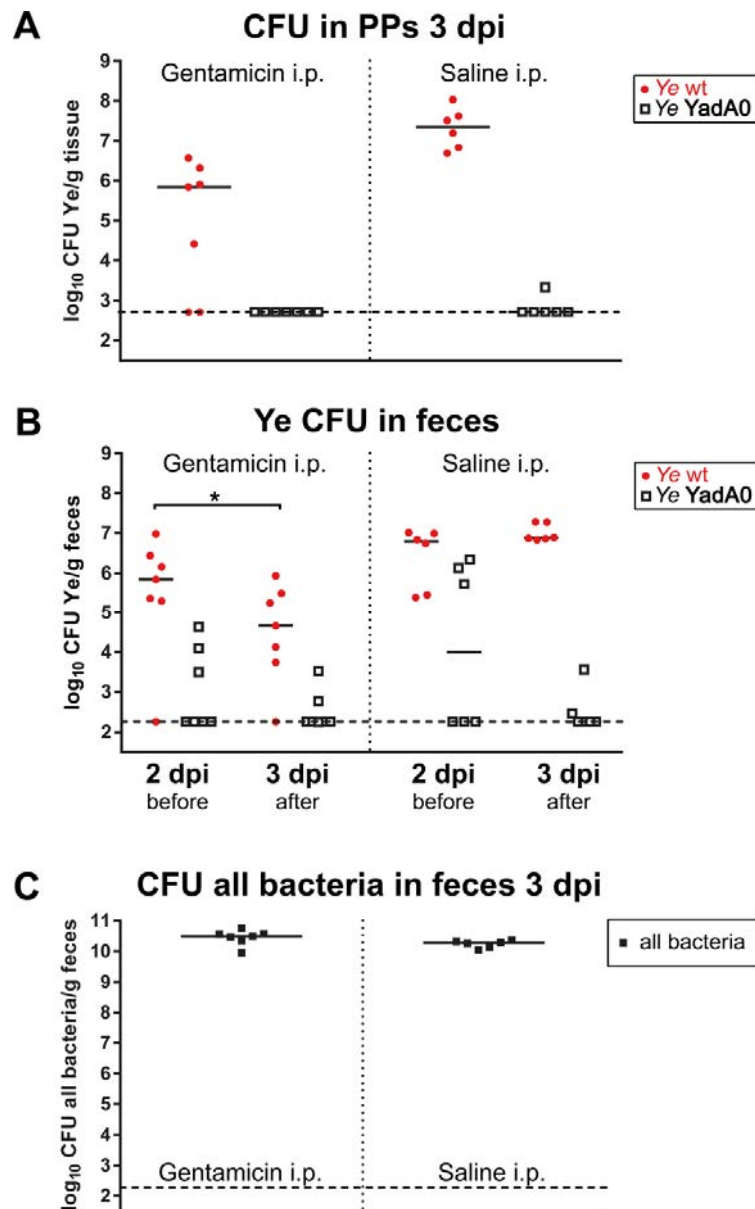

1044

1045 **Figure S5. Systemic administration of gentamicin for cleansing of a potential extra-luminal niche colonized by**  
1046 **Ye.** Mice were orally co-infected with a 1:1 mixture of Ye wt and Ye YadA0 for two days. At this time point, the  
1047 successful colonization of a potential niche was assumed. One group was then administered intraperitoneally with  
1048 gentamicin and a control group with saline only. (A) Ye wt and Ye YadA0 CFU was determined from Peyer's  
1049 patches (PP) on 3 dpi. (B) Ye CFU of both strains in feces on days 2 and 3 post-infection. (C) The impact of  
1050 systemic gentamicin treatment on the total CFU at 3 dpi of all cultivable bacteria was addressed by the plating of  
1051 feces on non-selective agar plates. A paired t-test assessed a statistically significant difference within the Gentamicin  
1052 treatment group.  $P = 0.494$ .

1053

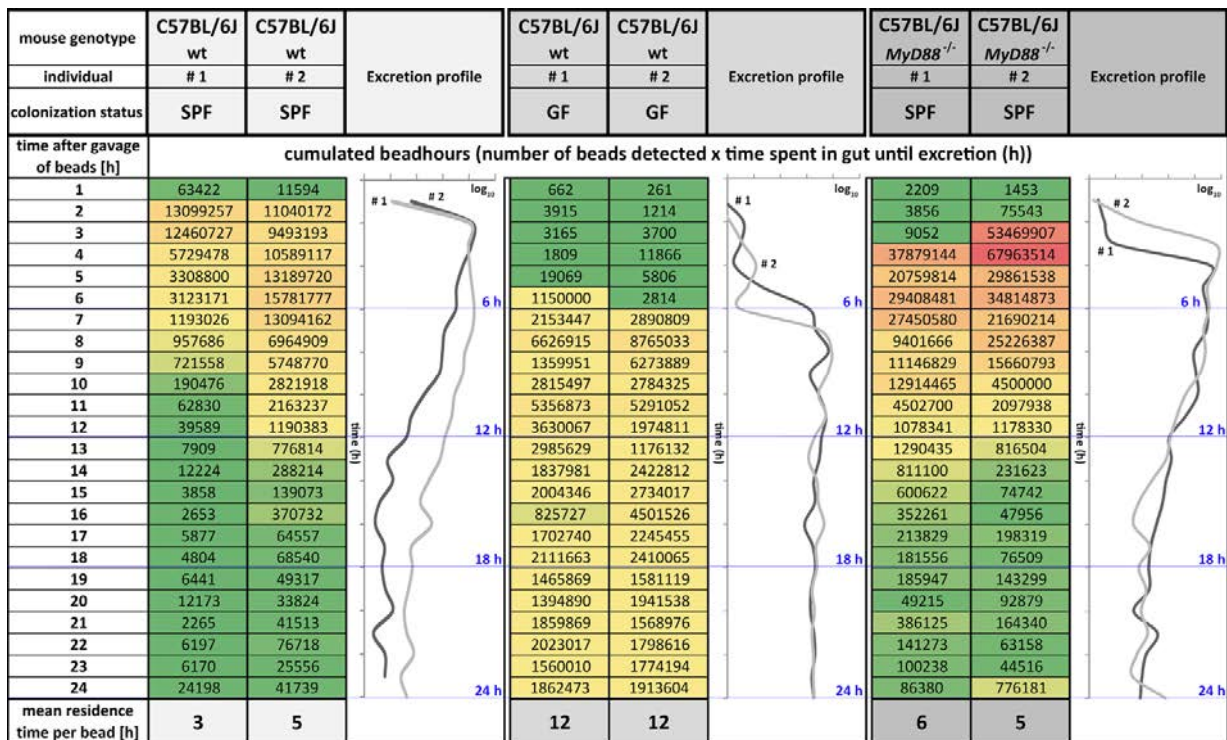

1054

1055

1056

1057

1058

1059

1060

1061

1062

1063

1064

1065

**Figure S6. Quantification of gut retention times in SPF-colonized or GF C57BL/6J wild type mice and SPF-colonized *MyD88*<sup>-/-</sup> animals.** Two mice per group were orally challenged with  $1 \cdot 10^9$  fluorescent polystyrene beads plus  $5 \cdot 10^8$  CFU of Ye wt, and feces were collected hourly over 24 h. The number of fluorescent events/g feces at each time point was analyzed by flow cytometry. The cumulated bead-hours were calculated as shown in the heat maps, and the graphs are plotting the  $\log_{10}$  of cumulated bead-hours for the individual animals. The mean residence time per bead was calculated by dividing the sum of events/g of feces through the total number of bead-hours.

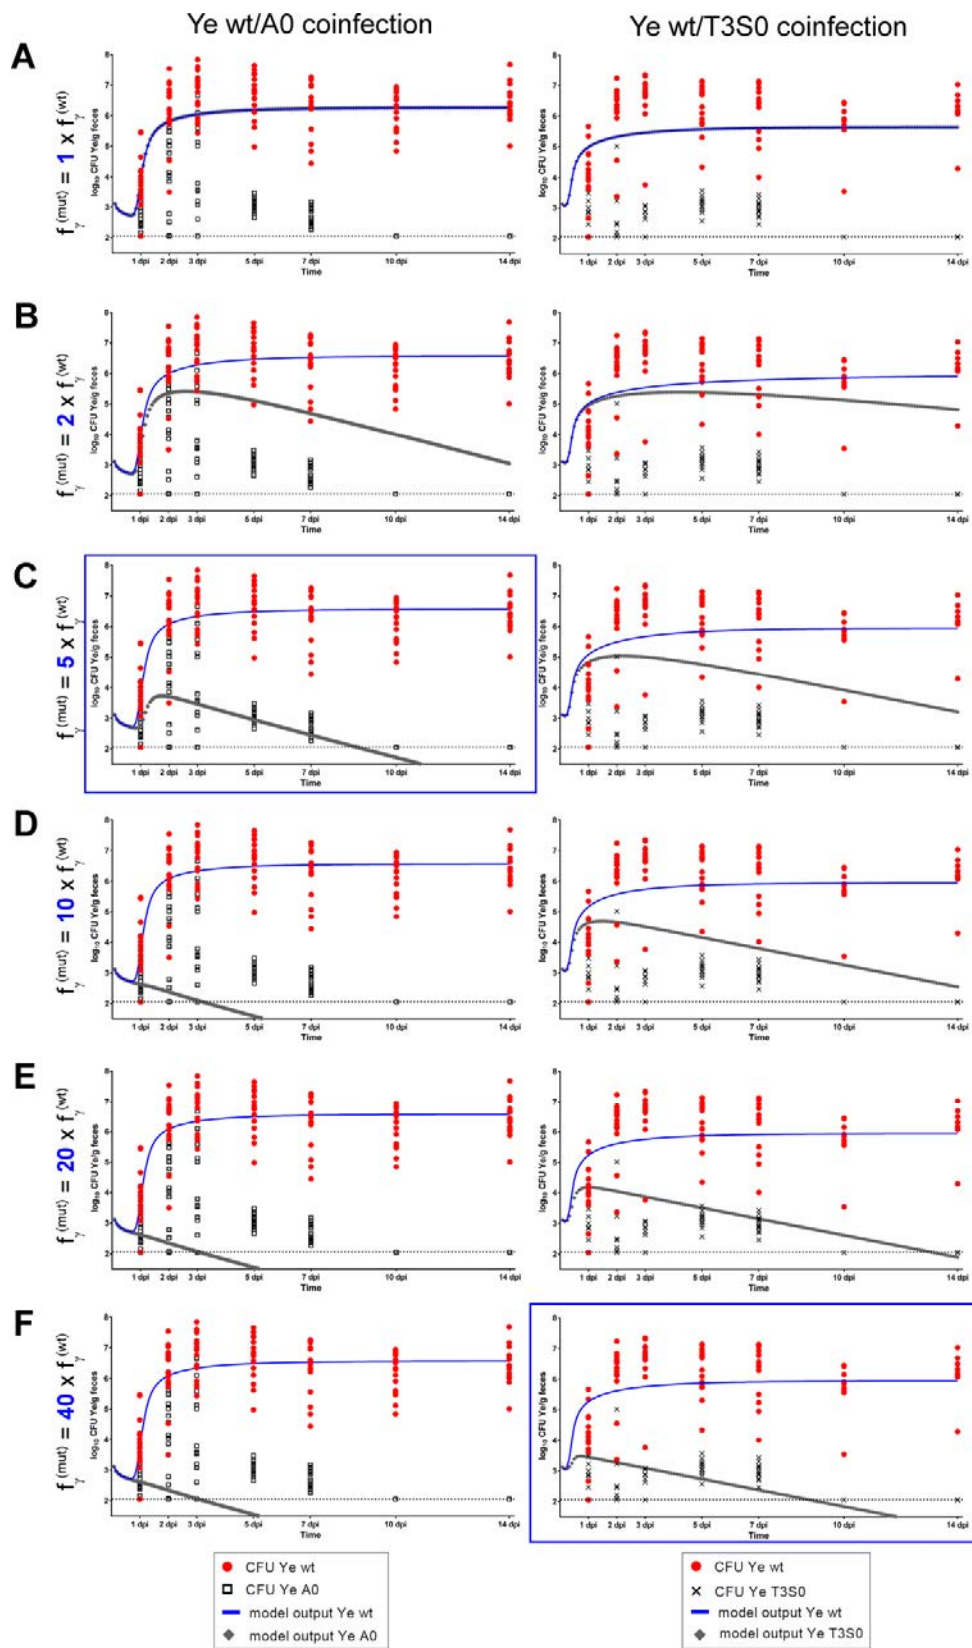

1066

1067 **Figure S7. Dynamics of model output when adopting different relations between  $f_Y^{(mut)}$  and  $f_Y^{(wt)}$ .** To visualize  
1068 the impact of the relative susceptibility to killing by the immune system on population dynamics of the Ye YadA0  
1069 (left column) and the Ye T3S0 strain (right column) we plotted curves for  $f_Y^{(mut)}$  adopting values **(A)** equal to that of  
1070  $f_Y^{(wt)}$ , **(B)**  $2x f_Y^{(wt)}$ , **(C)**  $5x f_Y^{(wt)}$ , **(D)**  $10x f_Y^{(wt)}$ , **(E)**  $20x f_Y^{(wt)}$  and **(F)**  $40x f_Y^{(wt)}$  for the respective settings. The  
1071 relationships that the best matched what our model calculated based on the experimental data are highlighted with a  
1072 blue frame.

1073

1074 **Table S8.** Mean percentage  $\pm$  SD of water content in sections of the mouse GIT. SI1, SI2, SI3 indicate the respective  
1075 part of the SI that was analyzed. Please also refer to Figure EV4.

|            | <b>SI1 + ½ SI2</b> | <b>½ SI2 + SI3</b> | <b>Caecum</b>    | <b>Colon</b>      | <b>Fecal pellet</b> |
|------------|--------------------|--------------------|------------------|-------------------|---------------------|
| <b>SPF</b> | 74,64 $\pm$ 3,31   | 76,59 $\pm$ 3,85   | 75,42 $\pm$ 0,35 | 50,69 $\pm$ 16,31 | 29,66 $\pm$ 2,37    |
| <b>GF</b>  | 73,11 $\pm$ 3,14   | 73,63 $\pm$ 0,63   | 78,76 $\pm$ 1,79 | 70,07 $\pm$ 1,07  | 49,01 $\pm$ 3,69    |

1076

1077

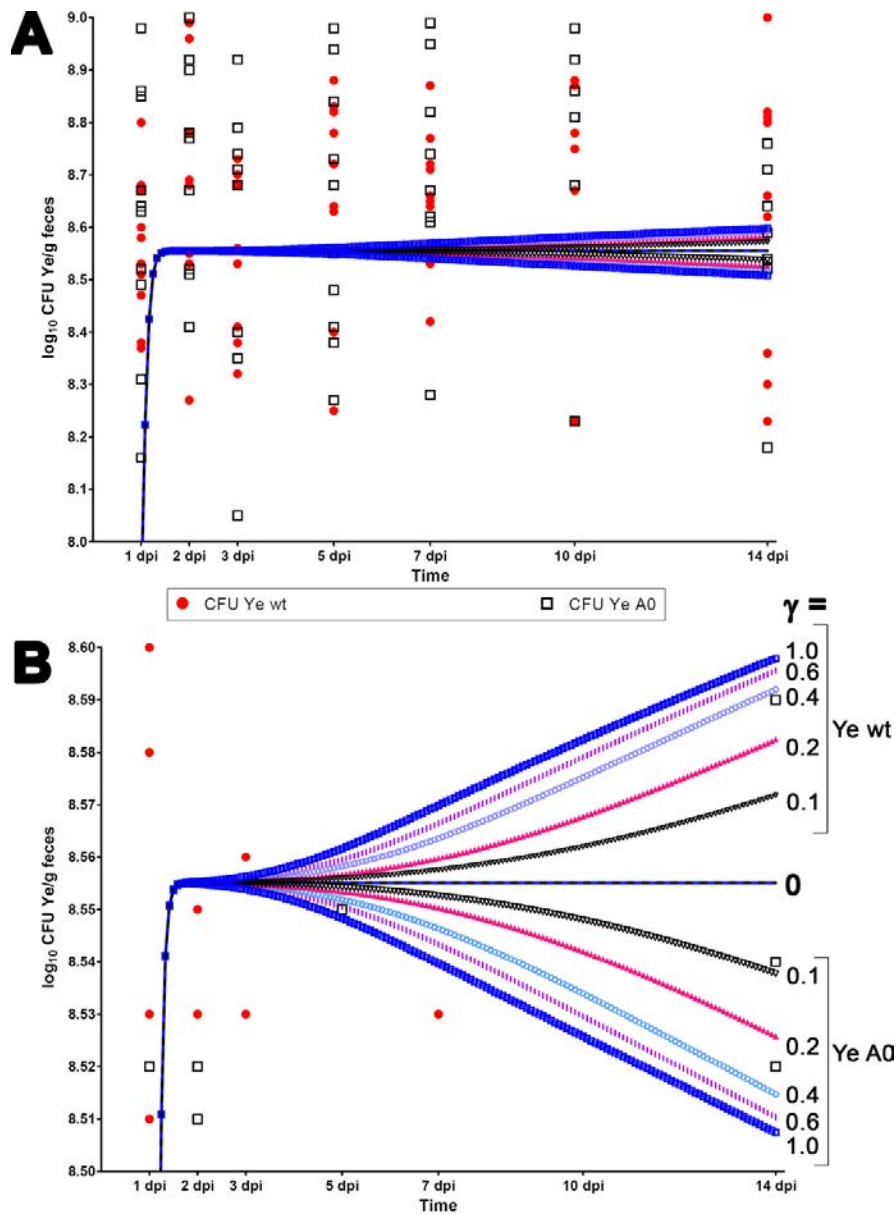

1078

1079 **Figure S9. Dynamics of model output in the GF infection setting when adopting different activities of the host**  
1080 **immune system. (A)** Using the same experimental data and parameter set as in Fig. 5A, we calculated the CFU  
1081 development after the coinfection of GF mice with Ye wt and Ye YadaA0 with  $\gamma$  adopting values between 1 (immune  
1082 system fully active) and 0 (no immune activity). **(B)** For better discrimination of curves, the scale of the y-axis was  
1083 altered. Curves of the same color and pattern represent one dataset showing the CFU development for Ye wt in the  
1084 upper half and that of Ye A0 in the lower half of the graph for a value of  $\gamma$  as indicated on the right side. High  
1085 activity of the immune system correlates with more considerable expansion of the Ye wt strain and decrease of CFU  
1086 of the Ye A0 strain, but the overall effect of changes in  $\gamma$  is subtle.

1087 **Table S10** Strains and plasmids used in this study

| Strain                  | Relevant characteristics                                                                                                | Resistance   | Source                     |
|-------------------------|-------------------------------------------------------------------------------------------------------------------------|--------------|----------------------------|
| Ye WA-C                 | <i>Yersinia enterocolitica</i> WA-314 serotype O:8, lacking the pYV plasmid                                             | Nal          | (Heesemann, 1987)          |
| YadA wt                 | <i>Yersinia enterocolitica</i> WA-314 serotype O:8 with pYV plasmid YadA wt                                             | Nal, Spec    | (Schütz et al., 2010)      |
| YadA0                   | YadA deficient mutant of WA-314, generated by insertion of a kanamycin cassette                                         | Nal, Kan     | (Roggenkamp et al., 1995)  |
| T3S0                    | pYV515 mutant strain of WA-314, deficient in Yop secretion, generated by Tn5 insertional inactivation of lcrD           | Nal, Kan     | (Ruckdeschel et al., 1996) |
| YadA0 CmR               | YadA0 with chromosomal insertion of a chloramphenicol cassette into the YenI locus                                      | Nal, Kan, Cm | this work                  |
| T3S0 CmR                | T3S0 with chromosomal insertion of a chloramphenicol cassette in YenI locus                                             | Nal, Kan, Cm | this work                  |
| <i>E. coli</i> 118λ pir | variant of <i>E. coli</i> CC 118, used to maintain suicide plasmids                                                     |              | (Herrero et al., 1990)     |
| <i>E. coli</i> β2163    | strain, carrying a Δdap::(erm-pir) and RP4 from <i>E. coli</i> SM10 used for conjugative transfer and counter selection | Kan          | (Demarre et al., 2005)     |
| Plasmid                 | Relevant characteristics                                                                                                |              | Source                     |
| pSB890Y                 | suicide cloning vector with PstI restriction sites mutated                                                              | Tet          | this work                  |
| pASK-IBA4C              | expression plasmid with chloramphenicol <sup>R</sup> cassette                                                           | Cm           | IBA Lifesciences           |

1088 Cm: Chloramphenicol; Kan: Kanamycin; Nal: Nalidixic acid; Spec: Spectinomycin; Tet: Tetracyclin

1089



1090 **Table S11** Oligonucleotides used in this study

| Name                                    | Sequence (5'→3')                                           | Description                                                                                            |
|-----------------------------------------|------------------------------------------------------------|--------------------------------------------------------------------------------------------------------|
| <b><u>Generation of mutants</u></b>     |                                                            |                                                                                                        |
| <b>gib_uni_890_r2</b>                   | CAAGAGGGTCATTATATTTTCGCG                                   | reverse (rev.) primer for linearization of pSB890Y                                                     |
| <b>gib_uni_890_f2</b>                   | CAAGCTCAATAAAAAGCCCCAC                                     | forward (fwd.) primer for linearization of pSB890Y                                                     |
| <b>gib_Yen_up_f</b>                     | GTTATTCCGCGAAATATAATGACCCTCTT<br>GCAGTACTTTTCGCCCAAGAGC    | fwd. primer for upstream fragment complementary to YenI locus with overlaps to PSB890Y                 |
| <b>gib_Yen_up_r2</b>                    | GTGAAAGTTGGAACCTCTTACGTGCCGAT<br>CTGTCAATTCACCTACCTCAGATC  | rev. mutagenesis primer for upstream fragment complementary to YenI locus with overlaps to Cm cassette |
| <b>gib_Yen_camp_f2</b>                  | AATGGGATGATCTGAGGTAGTGAATTGAC<br>AGATCGGCACGTAAGAGGTTCC    | fwd. primer for Cm gene in pASK-IBA4C with overlaps in YenI upstream fragment                          |
| <b>gib_Yen_camp_r2</b>                  | CTTTAAGGTTATCCATCAGAATGATTAAT<br>TCAAACCACCGCTGGTAGCGG     | rev. primer for Cm gene in pASK-IBA4C with overlaps in YenI downstream fragment                        |
| <b>gib_Yen_down_f2</b>                  | AAAAAAACCACCGCTACCAGCGGTGGTTT<br>GAATTAATCATTCTGATGGATAACC | fwd. primer for downstream fragment complementary to YenI locus with overlaps to Cm cassette           |
| <b>gib_Yen_down_r</b>                   | CCACCGCGGTGGGGCTTTTTATTGAGCTT<br>GTTATGCTCGCCAAATTTTCC     | rev. primer for downstream fragment complementary to YenI locus with overlaps to pSB890Y               |
| <b><u>Verification of mutations</u></b> |                                                            |                                                                                                        |
| <b>p890_seq_f</b>                       | CGTCACCAAATGATGTTATTCC                                     | fwd. primer for verification of constructs in pSB890Y                                                  |
| <b>p890_seq_r</b>                       | GTTGAGAAGCGGTGTAAGTG                                       | rev. primer for verification of constructs in pSB890Y                                                  |
| <b>Yen_851_f</b>                        | TGGGTGAGATGGTGTTAGGC                                       | sequencing primer for verification of construct in YenI locus                                          |
| <b>Yen_1336_f</b>                       | CAGCTGGATATTACGGCCTTT                                      | sequencing primer for verification of construct in YenI locus                                          |
| <b>Yen_1849_f</b>                       | CAACAGTACTGCGATGAGTGG                                      | sequencing primer for verification of construct in YenI locus                                          |

|                                               |                           |                                                               |
|-----------------------------------------------|---------------------------|---------------------------------------------------------------|
| <b>Yen_2356_f</b>                             | CGCTAAAGAAGAAAGGGAAACA    | sequencing primer for verification of construct in YenI locus |
| <b>Yen_2829_f</b>                             | CCCCTAATTTCTCCCACTT       | sequencing primer for verification of construct in YenI locus |
| <b>Yen_3200_r</b>                             | TTGATCTCTATTCTGCATTTTT    | sequencing primer for verification of construct in YenI locus |
| <b>Yen_3687_r</b>                             | TCGGTATGTACTGTCATCAATGTTT | sequencing primer for verification of construct in YenI locus |
| <b><u>TaqMan Assays used for qRT-PCRs</u></b> |                           |                                                               |
| <b>assay</b>                                  | <b>target</b>             | <b>source</b>                                                 |
| <b>Mm00441127_m1</b>                          | Reg3 $\gamma$             | ThermoFisher Scientific                                       |
| <b>Mm01197698_m1</b>                          | Gusb                      | ThermoFisher Scientific                                       |
| <b>Mm00496696_g1</b>                          | S100A8                    | ThermoFisher Scientific                                       |
| <b>Mm01324470_m1</b>                          | LCN2                      | ThermoFisher Scientific                                       |

1091

1092

1093

1094 **Additional files:**

1095 **S12** qRT-PCR raw data.

1096 **S13** The data set used to calibrate the model.

1097 **S14** Computational model in SBML format.

1098 The *Yersinia* colonization model was deposited in BioModels (Chelliah et al., 2015) and assigned the  
1099 identifier [identifiers.org/biomodels.db/MODEL2002070001](https://identifiers.org/biomodels.db/MODEL2002070001).

1100 **While under review**, access the models as follows

1101 1. Please visit <https://www.ebi.ac.uk/biomodels/models>.

1102 2. Log in with username reviewerForMODEL2002070001 and password YC91F7

1103 In case of problems, please email [biomodels-net-support@lists.sf.net](mailto:biomodels-net-support@lists.sf.net), indicating the username  
1104 reviewerForMODEL2002070001.

1105 **S15** Matlab script for parameter estimation.
